# Supplementary material for: Effect of Citrus aurantium juice as a disinfecting agent on quality and bacterial communities of striped catfish steaks stored at −20 °C
Source: PeerJ. 2023 Apr 11;11:e15168. doi: 10.7717/peerj.15168 (PMC10103698; doi:10.7717/peerj.15168)
Supplement: Supplemental Information 1 [file peerj-11-15168-s001.xlsx]

## Sheet: pH
pH	days							superscript			ANOVA
code			R1	R2	R3	AVR	SD				pH
1	0	CT	6.68	6.67	6.68	6.67667	0.0057735	a				Sum of Squares	df	Mean Square	F	Sig.
2	7	CT	6.11	6.22	6.34	6.22333	0.115036	b			Between Groups	3.49759	9	0.388621	14.4846	6.04515e-07
3	14	CT	6.51	6.71	6.68	6.63333	0.107858	a			Within Groups	0.5366	20	0.02683
4	21	CT	6.86	6.73	6.85	6.81333	0.0723418	a			Total	4.03419	29
5	28	CT	6.2	6.41	6.08	6.23	0.167033	b
pH	days										pH
code			R1	R2	R3	AVR	SD				Duncana
6	0	TM	5.9	5.8	5.42	5.70667	0.253246	c			Code	N	Subset for alpha = 0.05
7	7	TM	6.68	6.67	6.83	6.72667	0.0896289	a					1	2	3
8	14	TM	6.36	6.68	6.69	6.57667	0.187705	a			6.00	3	5.70667
9	21	TM	6.24	6.61	6.79	6.54667	0.280416	a			10.00	3		5.99333
10	28	TM	6.14	5.83	6.01	5.99333	0.155671	b			2.00	3		6.22333
											5.00	3		6.23
											9.00	3			6.54667
											8.00	3			6.57667
											3.00	3			6.63333
											1.00	3			6.67667
											7.00	3			6.72667
											4.00	3			6.81333
											Sig.		1	0.108476	0.0910723
											Means for groups in homogeneous subsets are displayed.
											a. Uses Harmonic Mean Sample Size = 3.000.

## Sheet: Texture
Hardness	days							superscript		ANOVA							Hardness
code			R1	R2	R3	AVR	SD			Hardness							Duncana
1	0	CT	455	568	445	489.333	68.3106	ab			Sum of Squares	df	Mean Square	F	Sig.		Code	N	Subset for alpha = 0.05
2	7	CT	515	473	529	505.667	29.1433	ab		Between Groups	548363	9	60929.2	1.3413	0.277915				1	2
3	14	CT	606	447	539	530.667	79.8269	ab		Within Groups	908513	20	45425.6				10.00	3	350.333
4	21	CT	694	876	516	695.333	180.004	ab		Total	1.45688e+06	29					1.00	3	489.333	489.333
5	28	CT	828	1308	407	847.667	450.822	a									2.00	3	505.667	505.667
																	3.00	3	530.667	530.667
																	6.00	3	589.667	589.667
Hardness	days																9.00	3	658.667	658.667
code			R1	R2	R3	AVR	SD										8.00	3	666.667	666.667
6	0	TM	692	425	652	589.667	144.001	ab									4.00	3	695.333	695.333
7	7	TM	1190	494	501	728.333	399.83	ab									7.00	3	728.333	728.333
8	14	TM	651	571	778	666.667	104.386	ab									5.00	3		847.667
9	21	TM	594	764	618	658.667	92.0072	ab									Sig.		0.0735931	0.088677
10	28	TM	407	256	388	350.333	82.2456	b									Means for groups in homogeneous subsets are displayed.
																	a. Uses Harmonic Mean Sample Size = 3.000.
Adhesiveness	days							superscript		ANOVA							Adhesiveness
code			R1	R2	R3	AVR	SD			Adhesiveness							Duncana
1	0	CT	0.7	0.2	0.8	0.566667	0.321455	c			Sum of Squares	df	Mean Square	F	Sig.		Code	N	Subset for alpha = 0.05
2	7	CT	1	2.2	1.9	1.7	0.6245	abc		Between Groups	20.8697	9	2.31885	1.82491	0.12587				1	2	3
3	14	CT	0.8	1.7	2.4	1.63333	0.802081	abc		Within Groups	25.4133	20	1.27067				1.00	3	0.566667
4	21	CT	0.3	0.9	3	1.4	1.41774	abc		Total	46.283	29					6.00	3	0.933333	0.933333
5	28	CT	6.4	1.8	2.4	3.53333	2.50067	a									4.00	3	1.4	1.4	1.4
																	3.00	3	1.63333	1.63333	1.63333
																	9.00	3	1.66667	1.66667	1.66667
Adhesiveness	days																2.00	3	1.7	1.7	1.7
code			R1	R2	R3	AVR	SD										7.00	3	2.03333	2.03333	2.03333
6	0	TM	0.8	0.6	1.4	0.933333	0.416333	bc									10.00	3	2.36667	2.36667	2.36667
7	7	TM	3.7	1	1.4	2.03333	1.45717	abc									8.00	3		2.86667	2.86667
8	14	TM	1.8	3.3	3.5	2.86667	0.929157	ab									5.00	3			3.53333
9	21	TM	2	1.5	1.5	1.66667	0.288675	abc									Sig.		0.102859	0.0811326	0.0559365
10	28	TM	2.4	2.6	2.1	2.36667	0.251661	abc									Means for groups in homogeneous subsets are displayed.
																	a. Uses Harmonic Mean Sample Size = 3.000.
Springiness	days							superscript		ANOVA							Springiness
code			R1	R2	R3	AVR	SD			Springiness							Duncana
1	0	CT	6.83	4.02	5.83	5.56	1.42432	bc			Sum of Squares	df	Mean Square	F	Sig.		Code	N	Subset for alpha = 0.05
2	7	CT	4.42	6.03	7.39	5.94667	1.48675	bc		Between Groups	49.8729	9	5.54143	2.7177	0.0300118				1	2	3
3	14	CT	5.94	6.7	7.97	6.87	1.02562	bc		Within Groups	40.7803	20	2.03902				7.00	3	4.91
4	21	CT	5.7	6.85	6.85	6.46667	0.663953	bc		Total	90.6532	29					1.00	3	5.56	5.56
5	28	CT	11.03	8.23	9.57	9.61	1.40043	a									6.00	3	5.86667	5.86667
																	2.00	3	5.94667	5.94667
																	9.00	3	6.11	6.11
Springiness	days																4.00	3	6.46667	6.46667
code			R1	R2	R3	AVR	SD										3.00	3	6.87	6.87
6	0	TM	5.5	4.24	7.86	5.86667	1.83764	bc									10.00	3	7.55333	7.55333	7.55333
7	7	TM	6.03	3.47	5.23	4.91	1.30966	c									8.00	3		7.81333	7.81333
8	14	TM	7.88	9.53	6.03	7.81333	1.75095	ab									5.00	3			9.61
9	21	TM	6.33	6.22	5.78	6.11	0.291033	bc									Sig.		0.0611066	0.106725	0.10954
10	28	TM	9.57	7.73	5.36	7.55333	2.11055	abc									Means for groups in homogeneous subsets are displayed.
																	a. Uses Harmonic Mean Sample Size = 3.000.
Cohesiveness	days							superscript		ANOVA							Cohesiveness
code			R1	R2	R3	AVR	SD			Cohesiveness							Duncana
1	0	CT	0.24	0.22	0.34	0.266667	0.064291	ab			Sum of Squares	df	Mean Square	F	Sig.		Code	N	Subset for alpha = 0.05
2	7	CT	0.22	0.24	0.32	0.26	0.052915	ab		Between Groups	0.05012	9	0.00556889	1.41342	0.247353				1	2
3	14	CT	0.18	0.4	0.41	0.33	0.13	ab		Within Groups	0.0788	20	0.00394				7.00	3	0.21
4	21	CT	0.21	0.23	0.28	0.24	0.0360555	ab		Total	0.12892	29					6.00	3	0.226667
5	28	CT	0.25	0.29	0.24	0.26	0.0264575	ab									4.00	3	0.24	0.24
																	10.00	3	0.256667	0.256667
																	2.00	3	0.26	0.26
Cohesiveness	days																5.00	3	0.26	0.26
code			R1	R2	R3	AVR	SD										8.00	3	0.26	0.26
6	0	TM	0.24	0.22	0.22	0.226667	0.011547	b									1.00	3	0.266667	0.266667
7	7	TM	0.23	0.15	0.25	0.21	0.052915	b									3.00	3	0.33	0.33
8	14	TM	0.31	0.27	0.2	0.26	0.0556776	ab									9.00	3		0.35
9	21	TM	0.33	0.44	0.28	0.35	0.0818535	a									Sig.		0.0551425	0.0751429
10	28	TM	0.24	0.29	0.24	0.256667	0.0288675	ab									Means for groups in homogeneous subsets are displayed.
																	a. Uses Harmonic Mean Sample Size = 3.000.

## Sheet: PV
PV	days		Sodium thiosulfate - Blank (ml)			R1	R2	R3			superscript			ANOVA							PV
code			R1	R2	R3	meq/g	meq/g	meq/g	AVR	SD				PV							Duncana
1	0	CT	14.4	26.5	29.3	0.288	0.53	0.586	0.468	0.158379	d				Sum of Squares	df	Mean Square	F	Sig.		code	N	Subset for alpha = 0.05
2	7	CT	18.3	22.4	23.9	0.366	0.448	0.478	0.430667	0.057977	d			Between Groups	6.14198	9	0.682442	23.1729	1.07782e-08				1	2	3	4
3	14	CT	90	91	68.5	1.8	1.82	1.37	1.66333	0.254231	a			Within Groups	0.589	20	0.02945				2.00	3	0.430667
4	21	CT	48.7	47.1	45.4	0.974	0.942	0.908	0.941333	0.0330051	bc			Total	6.73098	29					1.00	3	0.468
5	28	CT	65.7	70.5	78.7	1.314	1.41	1.574	1.43267	0.131474	a										7.00	3	0.501333
																					6.00	3	0.657333	0.657333
																					4.00	3		0.941333	0.941333
																					9.00	3			0.996
																					8.00	3				1.354
PV	days		Sodium thiosulfate - Blank (ml)			R1	R2	R3													5.00	3				1.43267
code			R1	R2	R3	meq/g	meq/g	meq/g	AVR	SD											10.00	3				1.564
6	0	TM	12.8	43.5	42.3	0.256	0.87	0.846	0.657333	0.347772	cd										3.00	3				1.66333
7	7	TM	14.3	28.5	32.4	0.286	0.57	0.648	0.501333	0.190519	d										Sig.		0.15269	0.0562188	0.700554	0.0546992
8	14	TM	62	69.5	71.6	1.24	1.39	1.432	1.354	0.100936	a										Means for groups in homogeneous subsets are displayed.
9	21	TM	47.4	49.2	52.8	0.948	0.984	1.056	0.996	0.0549909	b										a. Uses Harmonic Mean Sample Size = 3.000.
10	28	TM	72.8	77.8	84	1.456	1.556	1.68	1.564	0.112214	a

## Sheet: Colors
L*	days							superscript			ANOVA							L
code			R1	R2	R3	AVR	SD				L							Duncana
1	0	CT	53.96	54.04	54.53	54.1767	0.308599	c				Sum of Squares	df	Mean Square	F	Sig.		code	N	Subset for alpha = 0.05
2	7	CT	67.85	70.01	71.59	69.8167	1.87748	a			Between Groups	883.95	9	98.2167	18.1083	9.23753e-08				1	2	3
3	14	CT	57.16	52.61	55.86	55.21	2.34361	c			Within Groups	108.477	20	5.42384				1.00	3	54.1767
4	21	CT	57.42	60.55	51.91	56.6267	4.37429	c			Total	992.427	29					10.00	3	55.0667
5	28	CT	57.88	62.72	65.09	61.8967	3.67484	b										3.00	3	55.21
																		9.00	3	56.01
																		4.00	3	56.6267
L*	days																	6.00	3	56.97
code			R1	R2	R3	AVR	SD											8.00	3	58.0767	58.0767
6	0	TM	55.33	58.69	56.89	56.97	1.68143	c										5.00	3		61.8967
7	7	TM	66.99	68.18	71.43	68.8667	2.29827	a										7.00	3			68.8667
8	14	TM	57.77	57.82	58.64	58.0767	0.488501	bc										2.00	3			69.8167
9	21	TM	55.25	57.84	54.94	56.01	1.59239	c										Sig.		0.0857521	0.0582411	0.622814
10	28	TM	53.7	56.2	55.3	55.0667	1.26623	c										Means for groups in homogeneous subsets are displayed.
																		a. Uses Harmonic Mean Sample Size = 3.000.
a*	days							superscript			ANOVA							a
code			R1	R2	R3	AVR	SD				a							Duncana
1	0	CT	10.67	11.02	12.68	11.4567	1.07379	de				Sum of Squares	df	Mean Square	F	Sig.		code	N	Subset for alpha = 0.05
2	7	CT	14.06	12.22	11.68	12.6533	1.24777	cde			Between Groups	99.3176	9	11.0353	7.56478	8.89412e-05				1	2	3	4	5
3	14	CT	15.34	16.43	19.42	17.0633	2.11245	a			Within Groups	29.1755	20	1.45877				6.00	3	10.9367
4	21	CT	13.23	14.78	14.91	14.3067	0.934684	bc			Total	128.493	29					1.00	3	11.4567	11.4567
5	28	CT	15.3	15.43	18	16.2433	1.52271	ab										2.00	3	12.6533	12.6533	12.6533
																		8.00	3	12.7633	12.7633	12.7633
																		10.00	3		13.4733	13.4733
a*	days																	7.00	3			13.8467
code			R1	R2	R3	AVR	SD											9.00	3			14.1933	14.1933
6	0	TM	9.79	11.45	11.57	10.9367	0.994853	e										4.00	3			14.3067	14.3067
7	7	TM	13.61	14.27	13.66	13.8467	0.367469	c										5.00	3				16.2433	16.2433
8	14	TM	13.06	11.32	13.91	12.7633	1.32024	cde										3.00	3					17.0633
9	21	TM	13.55	13.92	15.11	14.1933	0.815128	bc										Sig.		0.103496	0.0737526	0.151955	0.061798	0.415505
10	28	TM	14.24	12.59	13.59	13.4733	0.831164	cd										Means for groups in homogeneous subsets are displayed.
																		a. Uses Harmonic Mean Sample Size = 3.000.
b*	days							superscript			ANOVA							b
code			R1	R2	R3	AVR	SD				b							Duncana
1	0	CT	14	15.81	15.16	14.99	0.916897	b				Sum of Squares	df	Mean Square	F	Sig.		code	N	Subset for alpha = 0.05
2	7	CT	10.56	7.2	10.64	9.46667	1.9634	c			Between Groups	496.541	9	55.1712	9.23567	2.09309e-05				1	2	3
3	14	CT	18.67	18.31	22.89	19.9567	2.54671	a			Within Groups	119.474	20	5.97371				2.00	3	9.46667
4	21	CT	14.21	13.45	8.19	11.95	3.27835	bc			Total	616.015	29					6.00	3	9.83
5	28	CT	18.84	21.75	23.75	21.4467	2.46901	a										9.00	3	9.99
																		7.00	3	10.78	10.78
																		10.00	3	11.48	11.48
b*	days																	4.00	3	11.95	11.95
code			R1	R2	R3	AVR	SD											1.00	3		14.99
6	0	TM	7.7	11.34	10.45	9.83	1.89755	c										8.00	3		15.0867
7	7	TM	9.44	13.66	9.24	10.78	2.49616	bc										3.00	3			19.9567
8	14	TM	14.67	14.89	15.7	15.0867	0.542433	b										5.00	3			21.4467
9	21	TM	9.09	11.33	9.55	9.99	1.18305	c										Sig.		0.282754	0.0649617	0.46397
10	28	TM	9.52	16.62	8.3	11.48	4.49297	bc										Means for groups in homogeneous subsets are displayed.
																		a. Uses Harmonic Mean Sample Size = 3.000.

## Sheet: TVB-N
TVB-N			Hydrochloric acid - Blank (ml)			mg/100g	mg/100g	mg/100g	AVR	SD	superscript
code	days		R1	R2	R3										ANOVA							TVB-N
1	0	CT	0.75	0.65	0.76	3.15	2.73	3.192	3.024	0.255476	cd				TVB-N							Duncana
2	7	CT	1.1	1.28	0.9	4.62	5.376	3.78	4.592	0.798368	b					Sum of Squares	df	Mean Square	F	Sig.		code	N	Subset for alpha = 0.05
3	14	CT	0.9	0.8	0.8	3.78	3.36	3.36	3.5	0.242487	bcd				Between Groups	55.1405	9	6.12672	14.4817	6.05493e-07				1	2	3	4
4	21	CT	0.85	0.75	1.3	3.57	3.15	5.46	4.06	1.23049	bc				Within Groups	8.46132	20	0.423066				8.00	3	2.66
5	28	CT	1.55	1.55	1.55	6.51	6.51	6.51	6.51	1.08779e-15	a				Total	63.6018	29					7.00	3	2.94	2.94
code																						6.00	3	3.01	3.01
6	0	TM	0.65	0.75	0.75	2.73	3.15	3.15	3.01	0.242487	cd											1.00	3	3.024	3.024
7	7	TM	0.7	0.7	0.7	2.94	2.94	2.94	2.94	0	cd											3.00	3	3.5	3.5	3.5
8	14	TM	0.65	0.65	0.6	2.73	2.73	2.52	2.66	0.121244	d											4.00	3		4.06	4.06
9	21	TM	0.8	1	1.3	3.36	4.2	5.46	4.34	1.05698	b											9.00	3			4.34
10	28	TM	1.4	1.8	1.5	5.88	7.56	6.3	6.58	0.8743	a											2.00	3			4.592
																						5.00	3				6.51
																						10.00	3				6.58
																						Sig.		0.169869	0.0709233	0.0722731	0.896454
																						Means for groups in homogeneous subsets are displayed.
																						a. Uses Harmonic Mean Sample Size = 3.000.

## Sheet: TCA soluble peptide
											AVR OD			protein concentration			protein concentration*dilution factor			final protein concentration
	Tyrosine (mg/ml)	AVR OD						code		days				mg/g	mg/g	mg/g	mg/g	mg/g	mg/g	mg/g	mg/g	mg/g	mg/g	SD	superscript
	0.01	0.393898									R1	R2	R3	R1	R2	R3	R1	R2	R3	R1	R2	R3	AVR						ANOVA
	0.02	0.473874						1	TM	0	0.188958	0.188723	0.194799	-0.0199781	-0.0200087	-0.0192176	0	0	0	0	0	0	0	0	h				TCA soluble peptide
	0.03	0.608566						2	CT	0	0.227568	0.217494	0.202562	-0.0149511	-0.0162627	-0.0182069	0	0	0	0	0	0	0	0	h					Sum of Squares	df	Mean Square	F	Sig.
	0.05	0.757438						3	TM	7	0.355018	0.365085	0.328597	0.00164286	0.00295358	-0.00179715	0.164286	0.295358	0	164.286	295.358	0	153.215	147.99	gh				Between Groups	1.79272e+08	9	1.99191e+07	378.261	2.4802e-20
	0.07	0.880036						4	CT	7	0.386932	0.389743	0.388971	0.00579806	0.00616405	0.00606354	0.579806	0.616405	0.606354	579.806	616.405	606.354	600.855	18.9091	ef				Within Groups	1.0532e+06	20	52659.8
	0.1	1.09121						5	TM	14	0.38171	0.370104	0.378383	0.00511816	0.00360706	0.00468498	0.511816	0.360706	0.468498	511.816	360.706	468.498	447.006	77.8137	fg				Total	1.80325e+08	29
								6	CT	14	0.394753	0.400626	0.43754	0.00681635	0.00758102	0.0123872	0.681635	0.758102	1.23872	681.635	758.102	1238.72	892.819	301.99	e
								7	TM	21	0.830189	0.844104	0.794382	0.0635101	0.0653218	0.058848	6.35101	6.53218	5.8848	6351.01	6532.18	5884.8	6255.99	333.984	b
								8	CT	21	0.875405	0.875648	0.868256	0.0693972	0.0694288	0.0684664	6.93972	6.94288	6.84664	6939.72	6942.88	6846.64	6909.75	54.6759	a				TCA soluble peptide
								9	TM	28	0.440902	0.422786	0.452127	0.0128249	0.0104662	0.0142864	1.92374	1.56994	2.14297	1923.74	1569.94	2142.97	1878.88	289.137	d				Duncana
								10	CT	28	0.508656	0.466317	0.470194	0.0216465	0.016134	0.0166388	3.24698	2.4201	2.49581	3246.98	2420.1	2495.81	2720.96	457.112	c				code	N	Subset for alpha = 0.05
																															1	2	3	4	5	6	7	8
																													1.00	3	0
																													2.00	3	0
																													3.00	3	153.215	153.215
																													5.00	3		447.006	447.006
																													4.00	3			600.855	600.855
																													6.00	3				892.819
																													9.00	3					1878.88
																													10.00	3						2720.96
																													7.00	3							6255.99
																													8.00	3								6909.75
																													Sig.		0.449211	0.132568	0.421266	0.134859	1	1	1	1
																													Means for groups in homogeneous subsets are displayed.
																													a. Uses Harmonic Mean Sample Size = 3.000.

## Sheet: Total viable count
Total viable count		AVR log cfu	SD
Control	0	6.89	0.04
	7	6.74	0.23
	14	6.98	0.07
	21	6.6	0.17
	28	7.87	0.01
		AVR log cfu	SD
TM	0	6.06	0.05
	7	6.83	0.01
	14	6.57	0.07
	21	6.54	0.09
	28	7.52	0.15
The total viable count was compared with edible limit of standard freshwater fish (ICMSF, 1986)
