# Supplementary material for: Effect of Citrus aurantium juice as a disinfecting agent on quality and bacterial communities of striped catfish steaks stored at −20 °C
Source: PeerJ. 2023 Apr 11;11:e15168. doi: 10.7717/peerj.15168 (PMC10103698; doi:10.7717/peerj.15168)
Supplement: Supplemental Information 2 [file peerj-11-15168-s002.xlsx]

## Sheet: abundance all
	ASV	Kingdom	Phylum	Class	Order	Family	Genus	CT0	CT28	TM0	TM28
1	SV003	Bacteria	Proteobacteria	Gammaproteobacteria	Pseudomonadales	Moraxellaceae	Acinetobacter	0.294567	0.245805	0.171513	0.201466
2	SV016	Bacteria	Proteobacteria	Gammaproteobacteria	Pseudomonadales	Moraxellaceae	Enhydrobacter	0.0395845	0.000393725	0.0298322	0.000424011
3	SV031	Bacteria	Proteobacteria	Alphaproteobacteria	Rhizobiales	Beijerinckiaceae	Methylobacterium-Methylorubrum	0.0299534	0	0	6.0573e-05
4	SV024	Bacteria	Bacteroidota	Bacteroidia	Flavobacteriales	Weeksellaceae	Soonwooa	0.0298928	0.000969168	0.0222909	0.000575444
5	SV026	Bacteria	Bacteroidota	Bacteroidia	Flavobacteriales	Weeksellaceae	Soonwooa	0.0249561	0	0.0182931	0
6	SV028	Bacteria	Bacteroidota	Bacteroidia	Flavobacteriales	Weeksellaceae	Chryseobacterium	0.0248652	0	0.0141741	0
7	SV006	Bacteria	Proteobacteria	Gammaproteobacteria	Aeromonadales	Aeromonadaceae	Aeromonas	0.0202314	0.0337392	0.0567872	0.0768369
8	SV020	Bacteria	Proteobacteria	Gammaproteobacteria	Burkholderiales	Comamonadaceae	Comamonas	0.0201708	0.000454298	0.0523048	0.00115089
9	SV033	Bacteria	Bacteroidota	Bacteroidia	Flavobacteriales	Weeksellaceae	Soonwooa	0.0197165	0	0.014901	0.000181719
10	SV012	Bacteria	Proteobacteria	Gammaproteobacteria	Pseudomonadales	Pseudomonadaceae	Pseudomonas	0.0137804	0.0131141	0.00578472	0.0217457
11	SV046	Bacteria	Proteobacteria	Gammaproteobacteria	Burkholderiales	Comamonadaceae	NA	0.0128718	3.02865e-05	0.00557272	0
12	SV053	Bacteria	Proteobacteria	Gammaproteobacteria	Pseudomonadales	Moraxellaceae	Psychrobacter	0.0120843	0.000302865	0	0.000393725
13	SV051	Bacteria	Bacteroidota	Bacteroidia	Flavobacteriales	Flavobacteriaceae	Flavobacterium	0.0108123	0	0.00708704	0
14	SV040	Bacteria	Proteobacteria	Gammaproteobacteria	Pseudomonadales	Moraxellaceae	Acinetobacter	0.0106003	0	0.0183536	0.00109031
15	SV042	Bacteria	Bacteroidota	Bacteroidia	Flavobacteriales	Flavobacteriaceae	Flavobacterium	0.00890423	0.000302865	0.0168696	0.000302865
16	SV013	Bacteria	Proteobacteria	Gammaproteobacteria	Pseudomonadales	Pseudomonadaceae	Pseudomonas	0.00857108	0.0149312	0.00354352	0.0212308
17	SV044	Bacteria	Proteobacteria	Gammaproteobacteria	Pseudomonadales	Moraxellaceae	Acinetobacter	0.0080865	0.00190805	0.00272579	0.0017869
18	SV067	Bacteria	Proteobacteria	Gammaproteobacteria	Pseudomonadales	Moraxellaceae	Psychrobacter	0.00796535	0	0	0
19	SV058	Bacteria	Proteobacteria	Gammaproteobacteria	Burkholderiales	Comamonadaceae	Comamonas	0.00769277	0	0.00345266	0
20	SV055	Bacteria	Bacteroidota	Bacteroidia	Flavobacteriales	Weeksellaceae	Chryseobacterium	0.00760191	0.000726876	0.00533043	0.000545157
21	SV008	Bacteria	Proteobacteria	Gammaproteobacteria	Aeromonadales	Aeromonadaceae	Aeromonas	0.00738991	0.0283785	0.0060573	0.050003
22	SV027	Bacteria	Proteobacteria	Gammaproteobacteria	Aeromonadales	Aeromonadaceae	Aeromonas	0.00732934	0.00190805	0.0334666	0.00266521
23	SV068	Bacteria	Bacteroidota	Bacteroidia	Flavobacteriales	Weeksellaceae	NA	0.00705676	0	0.00212006	0
24	SV054	Bacteria	Fusobacteriota	Fusobacteriia	Fusobacteriales	Fusobacteriaceae	Fusobacterium	0.00654189	0	0.0117209	0
25	SV059	Bacteria	Proteobacteria	Gammaproteobacteria	Pseudomonadales	Moraxellaceae	Acinetobacter	0.00617845	0	0.0047247	0
26	SV062	Bacteria	Campilobacterota	Campylobacteria	Campylobacterales	Arcobacteraceae	Arcobacter	0.00602702	0	0.00629959	9.08595e-05
27	SV064	Bacteria	Bacteroidota	Bacteroidia	Bacteroidales	Dysgonomonadaceae	Dysgonomonas	0.00590587	0	0.00551214	0
28	SV035	Bacteria	Proteobacteria	Gammaproteobacteria	Pseudomonadales	Moraxellaceae	Acinetobacter	0.00587558	0.00590587	0.00372524	0.00496699
29	SV079	Bacteria	Proteobacteria	Gammaproteobacteria	Pseudomonadales	Moraxellaceae	Acinetobacter	0.00581501	0	0	0
30	SV063	Bacteria	Bacteroidota	Bacteroidia	Flavobacteriales	Weeksellaceae	Chryseobacterium	0.00575444	0	0.0071779	0
31	SV073	Bacteria	Bacteroidota	Bacteroidia	Bacteroidales	Rikenellaceae	dgA-11 gut group	0.005603	0	0.00115089	0
32	SV074	Bacteria	Actinobacteriota	Actinobacteria	Micrococcales	Micrococcaceae	Arthrobacter	0.005603	0.000151433	0.0022412	0
33	SV090	Bacteria	Bacteroidota	Bacteroidia	Flavobacteriales	Weeksellaceae	Chryseobacterium	0.00533043	0	0.00154461	0
34	SV095	Bacteria	Actinobacteriota	Actinobacteria	Corynebacteriales	Corynebacteriaceae	Lawsonella	0.00526985	0	0	0
35	SV047	Bacteria	Proteobacteria	Gammaproteobacteria	Pseudomonadales	Moraxellaceae	Acinetobacter	0.00484584	0.00284693	0.00069659	0.00387667
36	SV093	Bacteria	Bacteroidota	Bacteroidia	Flavobacteriales	Weeksellaceae	Chryseobacterium	0.00478527	0.000151433	0.000666303	9.08595e-05
37	SV096	Bacteria	Bacteroidota	Bacteroidia	Flavobacteriales	Flavobacteriaceae	Flavobacterium	0.0047247	0.000121146	0	0.000181719
38	SV110	Bacteria	Proteobacteria	Gammaproteobacteria	Pseudomonadales	Moraxellaceae	Acinetobacter	0.0047247	0	0	0
39	SV101	Bacteria	Bacteroidota	Bacteroidia	Bacteroidales	Bacteroidaceae	Bacteroides	0.00463384	0	0	0
40	SV089	Bacteria	Bacteroidota	Bacteroidia	Flavobacteriales	Weeksellaceae	Chryseobacterium	0.00445212	0	0.00245321	0
41	SV087	Bacteria	Fusobacteriota	Fusobacteriia	Fusobacteriales	Fusobacteriaceae	Cetobacterium	0.00442183	0	0.00257435	0
42	SV122	Bacteria	Proteobacteria	Gammaproteobacteria	Pseudomonadales	Moraxellaceae	Psychrobacter	0.00424011	0	0	0
43	SV108	Bacteria	Firmicutes	Clostridia	Oscillospirales	Ruminococcaceae	Subdoligranulum	0.00414925	6.0573e-05	0	0
44	SV115	Bacteria	Proteobacteria	Gammaproteobacteria	Pseudomonadales	Moraxellaceae	Acinetobacter	0.00411897	0	0	0
45	SV113	Bacteria	Bacteroidota	Bacteroidia	Flavobacteriales	Weeksellaceae	Soonwooa	0.00408868	0	0	0
46	SV080	Bacteria	Firmicutes	Negativicutes	Veillonellales-Selenomonadales	Veillonellaceae	Veillonella	0.00396753	0	0.00372524	0
47	SV104	Bacteria	Firmicutes	Bacilli	Bacillales	Planococcaceae	Kurthia	0.00396753	9.08595e-05	0	0.000363438
48	SV037	Bacteria	Proteobacteria	Gammaproteobacteria	Pseudomonadales	Pseudomonadaceae	Pseudomonas	0.00393725	0.00463384	0	0.00848022
49	SV106	Bacteria	Proteobacteria	Gammaproteobacteria	Pseudomonadales	Moraxellaceae	Acinetobacter	0.00390696	0	0	0
50	SV129	Bacteria	Proteobacteria	Gammaproteobacteria	Alteromonadales	Shewanellaceae	Shewanella	0.0038161	0	0	0
51	SV097	Bacteria	Proteobacteria	Gammaproteobacteria	Pseudomonadales	Moraxellaceae	Acinetobacter	0.00375553	0	0.00248349	0
52	SV127	Bacteria	Bacteroidota	Bacteroidia	Bacteroidales	Bacteroidaceae	Bacteroides	0.00372524	0	0	0
53	SV117	Bacteria	Proteobacteria	Gammaproteobacteria	Pseudomonadales	Moraxellaceae	Acinetobacter	0.00366467	0	0.000666303	0
54	SV118	Bacteria	Bacteroidota	Bacteroidia	Sphingobacteriales	Sphingobacteriaceae	Sphingobacterium	0.00363438	0	0	9.08595e-05
55	SV105	Bacteria	Desulfobacterota	Desulfovibrionia	Desulfovibrionales	Desulfovibrionaceae	Desulfovibrio	0.00357381	0	0.00148404	0
56	SV100	Bacteria	Proteobacteria	Gammaproteobacteria	Burkholderiales	Comamonadaceae	Comamonas	0.00339209	0	0.00302865	0
57	SV130	Bacteria	Proteobacteria	Gammaproteobacteria	Burkholderiales	Comamonadaceae	NA	0.00339209	0	0	0
58	SV136	Bacteria	Fusobacteriota	Fusobacteriia	Fusobacteriales	Fusobacteriaceae	Fusobacterium	0.0033618	0	0	0
59	SV140	Bacteria	Firmicutes	Clostridia	Lachnospirales	Lachnospiraceae	NA	0.0033618	0	0	0
60	SV151	Bacteria	Firmicutes	Clostridia	Lachnospirales	Lachnospiraceae	Blautia	0.0033618	0	0	0
61	SV152	Bacteria	Firmicutes	Bacilli	Erysipelotrichales	Erysipelotrichaceae	Holdemanella	0.0033618	0	0	0
62	SV091	Bacteria	Proteobacteria	Gammaproteobacteria	Pseudomonadales	Moraxellaceae	Psychrobacter	0.00333152	0	0.00293779	0
63	SV135	Bacteria	Firmicutes	Clostridia	Lachnospirales	Lachnospiraceae	NA	0.00330123	0	0	0
64	SV131	Bacteria	Firmicutes	Clostridia	Oscillospirales	Ruminococcaceae	Faecalibacterium	0.00321037	0	0	0
65	SV149	Bacteria	Proteobacteria	Gammaproteobacteria	Pseudomonadales	Moraxellaceae	Psychrobacter	0.00318008	0	0	0
66	SV163	Bacteria	Actinobacteriota	Actinobacteria	Corynebacteriales	Nocardiaceae	Rhodococcus	0.00308922	0	0	0
67	SV132	Bacteria	Bacteroidota	Bacteroidia	Flavobacteriales	Weeksellaceae	Chryseobacterium	0.00305894	0	0	0
68	SV146	Bacteria	Bacteroidota	Bacteroidia	Bacteroidales	Rikenellaceae	Alistipes	0.00305894	0	0	0
69	SV056	Bacteria	Proteobacteria	Gammaproteobacteria	Pseudomonadales	Moraxellaceae	Acinetobacter	0.00302865	0.00272579	0	0.00145375
70	SV111	Bacteria	Bacteroidota	Bacteroidia	Bacteroidales	Rikenellaceae	dgA-11 gut group	0.00302865	0	0.00257435	0
71	SV164	Bacteria	Proteobacteria	Gammaproteobacteria	Pseudomonadales	Moraxellaceae	Acinetobacter	0.00302865	0	0	0
72	SV137	Bacteria	Proteobacteria	Gammaproteobacteria	Burkholderiales	Comamonadaceae	NA	0.00296808	0	0.00109031	0
73	SV162	Bacteria	Firmicutes	Clostridia	Lachnospirales	Lachnospiraceae	Blautia	0.00293779	0	0	0
74	SV166	Bacteria	Proteobacteria	Gammaproteobacteria	Enterobacterales	Enterobacteriaceae	Citrobacter	0.00287722	0	0	0
75	SV124	Bacteria	Proteobacteria	Gammaproteobacteria	Enterobacterales	Morganellaceae	Morganella	0.00281665	0	0.00175662	0
76	SV158	Bacteria	Actinobacteriota	Actinobacteria	Frankiales	Sporichthyaceae	NA	0.00281665	0	0	0
77	SV160	Bacteria	Firmicutes	Clostridia	Peptostreptococcales-Tissierellales	Peptostreptococcaceae	Peptoclostridium	0.00281665	0	0	0
78	SV009	Bacteria	Firmicutes	Bacilli	Lactobacillales	Listeriaceae	Brochothrix	0.00272579	0.0505785	0.0193228	0.0197165
79	SV175	Bacteria	Proteobacteria	Gammaproteobacteria	Pseudomonadales	Moraxellaceae	Acinetobacter	0.00272579	0	0	0
80	SV177	Bacteria	Bacteroidota	Bacteroidia	Chitinophagales	Chitinophagaceae	Niabella	0.0026955	0	0	0
81	SV165	Bacteria	Proteobacteria	Gammaproteobacteria	Burkholderiales	Neisseriaceae	Stenoxybacter	0.00266521	0	0	0
82	SV169	Bacteria	Bacteroidota	Bacteroidia	Bacteroidales	Prevotellaceae	Prevotella	0.00266521	0	0	0
83	SV181	Bacteria	Proteobacteria	Gammaproteobacteria	Pseudomonadales	Moraxellaceae	Acinetobacter	0.00263493	0	0	0
84	SV107	Bacteria	Bacteroidota	Bacteroidia	Flavobacteriales	Crocinitomicaceae	Fluviicola	0.00260464	0	0.0031498	0
85	SV147	Bacteria	Bacteroidota	Bacteroidia	Bacteroidales	Prevotellaceae	Prevotella	0.00260464	0	0	0
86	SV167	Bacteria	Firmicutes	Clostridia	Clostridiales	Clostridiaceae	Clostridium sensu stricto 1	0.00257435	0	0	0
87	SV150	Bacteria	Bacteroidota	Bacteroidia	Flavobacteriales	Flavobacteriaceae	Flavobacterium	0.00251378	0	0.00124175	0
88	SV194	Bacteria	Firmicutes	Clostridia	Oscillospirales	Ruminococcaceae	Faecalibacterium	0.00251378	0	0	0
89	SV155	Bacteria	Proteobacteria	Alphaproteobacteria	Caulobacterales	Caulobacteraceae	Brevundimonas	0.00245321	0	0	0
90	SV172	Bacteria	Proteobacteria	Gammaproteobacteria	Enterobacterales	Morganellaceae	Providencia	0.00245321	0	0	0
91	SV098	Bacteria	Bacteroidota	Bacteroidia	Flavobacteriales	Flavobacteriaceae	Flavobacterium	0.00239263	0	0.00436126	0
92	SV182	Bacteria	Proteobacteria	Gammaproteobacteria	Pseudomonadales	Pseudomonadaceae	Pseudomonas	0.0022412	0	0	0
93	SV185	Bacteria	Actinobacteriota	Actinobacteria	Bifidobacteriales	Bifidobacteriaceae	Bifidobacterium	0.0022412	0	0	0
94	SV188	Bacteria	Bacteroidota	Bacteroidia	Bacteroidales	Prevotellaceae	Prevotella	0.0022412	0	0	0
95	SV199	Bacteria	Proteobacteria	Gammaproteobacteria	Pseudomonadales	Moraxellaceae	Acinetobacter	0.00221092	0	0	0
96	SV112	Bacteria	Proteobacteria	Gammaproteobacteria	Pseudomonadales	Pseudomonadaceae	Pseudomonas	0.00215034	0.000575444	0.000242292	0.000363438
97	SV180	Bacteria	Bacteroidota	Bacteroidia	Flavobacteriales	Weeksellaceae	Chryseobacterium	0.00215034	0	0	0
98	SV119	Bacteria	Actinobacteriota	Actinobacteria	Micrococcales	Micrococcaceae	Arthrobacter	0.00205948	0	0.00293779	3.02865e-05
99	SV170	Bacteria	Proteobacteria	Gammaproteobacteria	Burkholderiales	Comamonadaceae	NA	0.00205948	0	0	0
100	SV183	Bacteria	Bacteroidota	Bacteroidia	Flavobacteriales	Flavobacteriaceae	Flavobacterium	0.0020292	0	0.000333152	0
101	SV187	Bacteria	Firmicutes	Clostridia	Lachnospirales	Lachnospiraceae	Blautia	0.0020292	0	0	0
102	SV173	Bacteria	Bacteroidota	Bacteroidia	Flavobacteriales	Flavobacteriaceae	Flavobacterium	0.00199891	0	0	0
103	SV198	Bacteria	Bacteroidota	Bacteroidia	Flavobacteriales	Flavobacteriaceae	Flavobacterium	0.00199891	0	0	0
104	SV228	Bacteria	Desulfobacterota	Desulfovibrionia	Desulfovibrionales	Desulfovibrionaceae	Bilophila	0.00199891	0	0	0
105	SV195	Bacteria	Proteobacteria	Gammaproteobacteria	Aeromonadales	Aeromonadaceae	Aeromonas	0.00196862	0	0	0
106	SV213	Bacteria	Desulfobacterota	Desulfovibrionia	Desulfovibrionales	Desulfovibrionaceae	Bilophila	0.00196862	0	0	0
107	SV176	Bacteria	Proteobacteria	Gammaproteobacteria	Enterobacterales	Enterobacteriaceae	NA	0.00190805	0	0.000514871	0
108	SV025	Bacteria	Proteobacteria	Gammaproteobacteria	Alteromonadales	Shewanellaceae	Shewanella	0.00187776	0.0120237	0	0.0102066
109	SV116	Bacteria	Proteobacteria	Gammaproteobacteria	Burkholderiales	Comamonadaceae	NA	0.00187776	0	0.00481556	0
110	SV133	Bacteria	Proteobacteria	Gammaproteobacteria	Xanthomonadales	Xanthomonadaceae	Stenotrophomonas	0.00187776	0	0.00324066	0
111	SV200	Bacteria	Bacteroidota	Bacteroidia	Flavobacteriales	Weeksellaceae	Soonwooa	0.00187776	0	0	0
112	SV214	Bacteria	Bacteroidota	Bacteroidia	Flavobacteriales	Flavobacteriaceae	Flavobacterium	0.00187776	0	0	0
113	SV222	Bacteria	Proteobacteria	Gammaproteobacteria	Pseudomonadales	Moraxellaceae	Acinetobacter	0.00187776	0	0	0
114	SV126	Bacteria	Bacteroidota	Bacteroidia	Flavobacteriales	Weeksellaceae	Empedobacter	0.00181719	0	0.00272579	6.0573e-05
115	SV209	Bacteria	Bacteroidota	Bacteroidia	Flavobacteriales	Weeksellaceae	Chryseobacterium	0.0017869	0	0	0
116	SV226	Bacteria	Proteobacteria	Gammaproteobacteria	Pseudomonadales	Moraxellaceae	NA	0.00169604	0	0	0
117	SV071	Bacteria	Firmicutes	Bacilli	Lactobacillales	Streptococcaceae	Streptococcus	0.00163547	0	0.0110546	0
118	SV192	Bacteria	Bacteroidota	Bacteroidia	Chitinophagales	Chitinophagaceae	Niabella	0.00160519	0	0.0011206	0
119	SV203	Bacteria	Actinobacteriota	Actinobacteria	Bifidobacteriales	Bifidobacteriaceae	Bifidobacterium	0.00160519	0	0	0
120	SV227	Bacteria	Bacteroidota	Bacteroidia	Flavobacteriales	Weeksellaceae	Chryseobacterium	0.00160519	0	0	0
121	SV208	Bacteria	Proteobacteria	Gammaproteobacteria	Pseudomonadales	Moraxellaceae	Acinetobacter	0.00154461	0	0	0
122	SV223	Bacteria	Bacteroidota	Bacteroidia	Flavobacteriales	Weeksellaceae	Chryseobacterium	0.00154461	0	0	0
123	SV241	Bacteria	Proteobacteria	Gammaproteobacteria	Enterobacterales	Enterobacteriaceae	Cronobacter	0.00154461	0	0	0
124	SV215	Bacteria	Proteobacteria	Alphaproteobacteria	Rhodobacterales	Rhodobacteraceae	Paracoccus	0.00151433	0	0.000242292	0
125	SV268	Bacteria	Firmicutes	Clostridia	Lachnospirales	Lachnospiraceae	Dorea	0.00151433	0	0	0
126	SV221	Bacteria	Proteobacteria	Gammaproteobacteria	Burkholderiales	Neisseriaceae	Vitreoscilla	0.00148404	0	0	0
127	SV236	Bacteria	Proteobacteria	Gammaproteobacteria	Enterobacterales	Enterobacteriaceae	Citrobacter	0.00148404	0	0	0
128	SV216	Bacteria	Bacteroidota	Bacteroidia	Flavobacteriales	Weeksellaceae	NA	0.00142347	0	0.000848022	0
129	SV235	Bacteria	Proteobacteria	Gammaproteobacteria	Burkholderiales	Rhodocyclaceae	Dechlorobacter	0.00142347	0	0	0
130	SV243	Bacteria	Actinobacteriota	Actinobacteria	Micrococcales	Microbacteriaceae	Leucobacter	0.00142347	0	0	0
131	SV231	Bacteria	Bacteroidota	Bacteroidia	Bacteroidales	Bacteroidaceae	Bacteroides	0.00139318	0	0	0
132	SV189	Bacteria	Proteobacteria	Gammaproteobacteria	Burkholderiales	Neisseriaceae	Vitreoscilla	0.00136289	0	0.00248349	0
133	SV230	Bacteria	Proteobacteria	Gammaproteobacteria	Aeromonadales	Aeromonadaceae	Aeromonas	0.00136289	0	0	0
134	SV254	Bacteria	Firmicutes	Bacilli	Erysipelotrichales	Erysipelotrichaceae	[Anaerorhabdus] furcosa group	0.00136289	0	0	0
135	SV232	Bacteria	Bacteroidota	Bacteroidia	Sphingobacteriales	Sphingobacteriaceae	Pedobacter	0.00133261	0	0	0
136	SV238	Bacteria	Firmicutes	Clostridia	Lachnospirales	Lachnospiraceae	Dorea	0.00133261	0	0	0
137	SV259	Bacteria	Proteobacteria	Gammaproteobacteria	Burkholderiales	Comamonadaceae	Comamonas	0.00133261	0	0	0
138	SV245	Bacteria	Proteobacteria	Gammaproteobacteria	Enterobacterales	Enterobacteriaceae	NA	0.00127203	0	0	0
139	SV248	Bacteria	Proteobacteria	Gammaproteobacteria	Xanthomonadales	Xanthomonadaceae	Luteimonas	0.00127203	0	0	0
140	SV257	Bacteria	Actinobacteriota	Coriobacteriia	Coriobacteriales	Coriobacteriaceae	Collinsella	0.00124175	0	0	0
141	SV142	Bacteria	Bacteroidota	Bacteroidia	Flavobacteriales	Weeksellaceae	Empedobacter	0.00121146	0	0.0033618	0
142	SV022	Bacteria	Proteobacteria	Gammaproteobacteria	Aeromonadales	Aeromonadaceae	Aeromonas	0.0011206	0.00923739	0.0166273	0.0122963
143	SV281	Bacteria	Proteobacteria	Gammaproteobacteria	Enterobacterales	Enterobacteriaceae	NA	0.0011206	0	0	0
144	SV250	Bacteria	Proteobacteria	Gammaproteobacteria	Alteromonadales	Shewanellaceae	Shewanella	0.00109031	0	0	0
145	SV275	Bacteria	Bacteroidota	Bacteroidia	Sphingobacteriales	Sphingobacteriaceae	Sphingobacterium	0.00109031	0	0	0
146	SV094	Bacteria	Proteobacteria	Gammaproteobacteria	Pseudomonadales	Moraxellaceae	Acinetobacter	0.00106003	0.000636017	0.00148404	0.00127203
147	SV261	Bacteria	Proteobacteria	Gammaproteobacteria	Pseudomonadales	Moraxellaceae	Acinetobacter	0.00102974	0	0	0
148	SV288	Bacteria	Proteobacteria	Alphaproteobacteria	Rhodobacterales	Rhodobacteraceae	Paracoccus	0.00102974	0	0	0
149	SV284	Bacteria	Proteobacteria	Gammaproteobacteria	Burkholderiales	Comamonadaceae	NA	0.000999455	0	0	0
150	SV292	Bacteria	Firmicutes	Negativicutes	Veillonellales-Selenomonadales	Veillonellaceae	Megasphaera	0.000999455	0	0	0
151	SV298	Bacteria	Bacteroidota	Bacteroidia	Chitinophagales	Chitinophagaceae	Niabella	0.000969168	0	0	0
152	SV291	Bacteria	Actinobacteriota	Actinobacteria	Corynebacteriales	Nocardiaceae	NA	0.000908595	0	0	0
153	SV060	Bacteria	Verrucomicrobiota	Verrucomicrobiae	Verrucomicrobiales	Akkermansiaceae	Akkermansia	0.000878309	0	0.016173	0
154	SV280	Bacteria	Bacteroidota	Bacteroidia	Bacteroidales	Rikenellaceae	Alistipes	0.000817736	0	0	0
155	SV190	Bacteria	Fusobacteriota	Fusobacteriia	Fusobacteriales	Fusobacteriaceae	Cetobacterium	0.000787449	0	0.00293779	0
156	SV264	Bacteria	Fusobacteriota	Fusobacteriia	Fusobacteriales	Fusobacteriaceae	Cetobacterium	0.000787449	0	0	0
157	SV312	Bacteria	Proteobacteria	Gammaproteobacteria	Burkholderiales	Neisseriaceae	Stenoxybacter	0.000787449	0	0	0
158	SV301	Bacteria	Proteobacteria	Gammaproteobacteria	Pseudomonadales	Pseudomonadaceae	Pseudomonas	0.000757163	0	0	0
159	SV295	Bacteria	Bacteroidota	Bacteroidia	Flavobacteriales	Flavobacteriaceae	Flavobacterium	0.000726876	0	0	0
160	SV210	Bacteria	Bacteroidota	Bacteroidia	Flavobacteriales	Weeksellaceae	Empedobacter	0.000636017	0	0.00266521	0
161	SV320	Bacteria	Proteobacteria	Gammaproteobacteria	Pseudomonadales	Moraxellaceae	Acinetobacter	0.000636017	0	0	0
162	SV331	Bacteria	Bacteroidota	Bacteroidia	Bacteroidales	Rikenellaceae	dgA-11 gut group	0.000636017	0	0	0
163	SV302	Bacteria	Proteobacteria	Gammaproteobacteria	Pseudomonadales	Moraxellaceae	Acinetobacter	0.00060573	0	0	0
164	SV311	Bacteria	Bacteroidota	Bacteroidia	Bacteroidales	Bacteroidaceae	Bacteroides	0.000514871	0	0	0
165	SV049	Bacteria	Firmicutes	Bacilli	Lactobacillales	Streptococcaceae	Lactococcus	0.000454298	0.00266521	0.0033618	0.00357381
166	SV431	Bacteria	Proteobacteria	Gammaproteobacteria	Enterobacterales	Enterobacteriaceae	NA	0.000424011	0	0	0
167	SV471	Bacteria	Actinobacteriota	Actinobacteria	Micrococcales	Microbacteriaceae	Microbacterium	0.000424011	0	0	0
168	SV454	Bacteria	Proteobacteria	Gammaproteobacteria	Pseudomonadales	Pseudomonadaceae	Pseudomonas	0.000393725	0	0	0
169	SV430	Bacteria	Bacteroidota	Bacteroidia	Bacteroidales	Prevotellaceae	Prevotella	0.000302865	0	0	0
170	SV432	Bacteria	Firmicutes	Negativicutes	Veillonellales-Selenomonadales	Selenomonadaceae	Megamonas	0.000302865	0	0	0
171	SV453	Bacteria	Proteobacteria	Gammaproteobacteria	Pseudomonadales	Moraxellaceae	Acinetobacter	0.000212006	0	0	0
172	SV476	Bacteria	Actinobacteriota	Actinobacteria	Corynebacteriales	Corynebacteriaceae	Corynebacterium	0.000212006	0	0	0
173	SV535	Bacteria	Actinobacteriota	Actinobacteria	Propionibacteriales	Propionibacteriaceae	Cutibacterium	0.000212006	0	0	0
174	SV546	Bacteria	Firmicutes	Bacilli	Lactobacillales	Streptococcaceae	Streptococcus	0.000151433	0	0	0
175	SV590	Bacteria	Bacteroidota	Bacteroidia	Bacteroidales	Bacteroidaceae	Bacteroides	0.000121146	0	0	0
176	SV602	Bacteria	Desulfobacterota	Desulfovibrionia	Desulfovibrionales	Desulfovibrionaceae	Desulfovibrio	0.000121146	0	0	0
177	SV637	Bacteria	Bacteroidota	Bacteroidia	Flavobacteriales	Flavobacteriaceae	Flavobacterium	9.08595e-05	0	0	0
178	SV010	Bacteria	Proteobacteria	Gammaproteobacteria	Pseudomonadales	Pseudomonadaceae	Pseudomonas	6.0573e-05	0.0436429	0.00402811	0.021776
179	SV615	Bacteria	Proteobacteria	Alphaproteobacteria	Acetobacterales	Acetobacteraceae	Asaia	6.0573e-05	0	0	0
180	SV015	Bacteria	Proteobacteria	Gammaproteobacteria	Pseudomonadales	Pseudomonadaceae	Pseudomonas	3.02865e-05	0.0235023	0	0.00835908
181	SV636	Bacteria	Fusobacteriota	Fusobacteriia	Fusobacteriales	Fusobacteriaceae	Fusobacterium	3.02865e-05	0	0	0
182	SV638	Bacteria	Bacteroidota	Bacteroidia	Flavobacteriales	Weeksellaceae	Chryseobacterium	3.02865e-05	0	0	0
183	SV004	Bacteria	Proteobacteria	Gammaproteobacteria	Aeromonadales	Aeromonadaceae	Aeromonas	0	0.123508	0	0.0884063
184	SV005	Bacteria	Firmicutes	Bacilli	Staphylococcales	Staphylococcaceae	Macrococcus	0	0.0859531	0	0.125992
185	SV007	Bacteria	Proteobacteria	Gammaproteobacteria	Aeromonadales	Aeromonadaceae	Aeromonas	0	0.0316494	0.00284693	0.0619662
186	SV011	Bacteria	Proteobacteria	Gammaproteobacteria	Alteromonadales	Shewanellaceae	Shewanella	0	0.0216246	0.000787449	0.036253
187	SV014	Bacteria	Firmicutes	Bacilli	Lactobacillales	Streptococcaceae	Lactococcus	0	0.0226543	0.00536071	0.0116906
188	SV017	Bacteria	Proteobacteria	Gammaproteobacteria	Aeromonadales	Aeromonadaceae	Aeromonas	0	0.016597	0	0.0158096
189	SV018	Bacteria	Proteobacteria	Gammaproteobacteria	Alteromonadales	Shewanellaceae	Shewanella	0	0.0151735	0	0.0158398
190	SV019	Bacteria	Proteobacteria	Gammaproteobacteria	Pseudomonadales	Moraxellaceae	Acinetobacter	0	0.0217457	0	0.00626931
191	SV021	Bacteria	Proteobacteria	Gammaproteobacteria	Pseudomonadales	Moraxellaceae	Acinetobacter	0	0.0135684	0	0.0156278
192	SV023	Bacteria	Firmicutes	Bacilli	Lactobacillales	Carnobacteriaceae	Carnobacterium	0	0.0194742	0.000575444	0.00451269
193	SV030	Bacteria	Proteobacteria	Gammaproteobacteria	Pseudomonadales	Moraxellaceae	Psychrobacter	0	0.0117209	0.000302865	0.00496699
194	SV032	Bacteria	Firmicutes	Bacilli	Staphylococcales	Staphylococcaceae	Macrococcus	0	0.00766249	0.00199891	0.00929796
195	SV034	Bacteria	Proteobacteria	Gammaproteobacteria	Pseudomonadales	Pseudomonadaceae	Pseudomonas	0	0.00863166	0	0.00748077
196	SV038	Bacteria	Proteobacteria	Gammaproteobacteria	Aeromonadales	Aeromonadaceae	Aeromonas	0	0.00623902	0	0.00784421
197	SV039	Bacteria	Firmicutes	Bacilli	Lactobacillales	Streptococcaceae	Lactococcus	0	0.00917681	0	0.00251378
198	SV041	Bacteria	Proteobacteria	Gammaproteobacteria	Pseudomonadales	Moraxellaceae	Acinetobacter	0	0.00699618	0	0.00481556
199	SV043	Bacteria	Firmicutes	Bacilli	Lactobacillales	Streptococcaceae	Lactococcus	0	0.00233206	0.0080865	0.00620873
200	SV045	Bacteria	Proteobacteria	Gammaproteobacteria	Alteromonadales	Shewanellaceae	Shewanella	0	0.00420982	0.000333152	0.00548186
201	SV048	Bacteria	Proteobacteria	Gammaproteobacteria	Aeromonadales	Aeromonadaceae	Aeromonas	0	0.0029075	0	0.00578472
202	SV050	Bacteria	Firmicutes	Bacilli	Lactobacillales	Vagococcaceae	Vagococcus	0	0.00436126	0	0.00357381
203	SV052	Bacteria	Proteobacteria	Gammaproteobacteria	Pseudomonadales	Pseudomonadaceae	Pseudomonas	0	0.00475498	0	0.00372524
204	SV057	Bacteria	Fusobacteriota	Fusobacteriia	Fusobacteriales	Fusobacteriaceae	Cetobacterium	0	0.000333152	0.0201708	0.000272579
205	SV065	Bacteria	Proteobacteria	Gammaproteobacteria	Aeromonadales	Aeromonadaceae	Aeromonas	0	0.00142347	0.00166576	0.00354352
206	SV066	Bacteria	Firmicutes	Bacilli	Lactobacillales	Carnobacteriaceae	Carnobacterium	0	0.00275607	0	0.00272579
207	SV069	Bacteria	Firmicutes	Bacilli	Staphylococcales	Staphylococcaceae	Macrococcus	0	0.000969168	0	0.00369495
208	SV070	Bacteria	Proteobacteria	Gammaproteobacteria	Alteromonadales	Shewanellaceae	Shewanella	0	0.00145375	0	0.00260464
209	SV072	Bacteria	Firmicutes	Bacilli	Lactobacillales	Vagococcaceae	Vagococcus	0	0.00233206	0.00133261	0.00187776
210	SV075	Bacteria	Proteobacteria	Gammaproteobacteria	Burkholderiales	Chitinibacteraceae	Iodobacter	0	0.000484584	0.00293779	0.00254407
211	SV076	Bacteria	Proteobacteria	Gammaproteobacteria	Pseudomonadales	Moraxellaceae	Acinetobacter	0	0.00154461	0.00187776	0.00218063
212	SV077	Bacteria	Proteobacteria	Gammaproteobacteria	Alteromonadales	Shewanellaceae	Shewanella	0	0.00160519	0	0.00251378
213	SV081	Bacteria	Proteobacteria	Gammaproteobacteria	Alteromonadales	Shewanellaceae	Shewanella	0	0.00187776	0	0.00121146
214	SV082	Bacteria	Firmicutes	Bacilli	Staphylococcales	Staphylococcaceae	Macrococcus	0	0.00175662	0	0.00205948
215	SV083	Bacteria	Proteobacteria	Gammaproteobacteria	Pseudomonadales	Pseudomonadaceae	Pseudomonas	0	0.00109031	0	0.00221092
216	SV084	Bacteria	Fusobacteriota	Fusobacteriia	Fusobacteriales	Fusobacteriaceae	Cetobacterium	0	0	0.011418	0
217	SV085	Bacteria	Proteobacteria	Gammaproteobacteria	Pseudomonadales	Moraxellaceae	Psychrobacter	0	0.00227149	0	0.000787449
218	SV086	Bacteria	Proteobacteria	Gammaproteobacteria	Alteromonadales	Shewanellaceae	Shewanella	0	0.0015749	0	0.0026955
219	SV088	Bacteria	Proteobacteria	Gammaproteobacteria	Pseudomonadales	Moraxellaceae	Enhydrobacter	0	0	0.012054	0
220	SV099	Bacteria	Proteobacteria	Gammaproteobacteria	Pseudomonadales	Moraxellaceae	Acinetobacter	0	0.00124175	0.000272579	0.00133261
221	SV102	Bacteria	Proteobacteria	Gammaproteobacteria	Burkholderiales	Oxalobacteraceae	Janthinobacterium	0	0.00139318	0.000757163	0.00069659
222	SV103	Bacteria	Firmicutes	Bacilli	Lactobacillales	Streptococcaceae	Streptococcus	0	0.00142347	0	0.00139318
223	SV109	Bacteria	Proteobacteria	Gammaproteobacteria	Pseudomonadales	Moraxellaceae	Acinetobacter	0	0	0	0.0026955
224	SV120	Bacteria	Proteobacteria	Gammaproteobacteria	Pseudomonadales	Moraxellaceae	Acinetobacter	0	0	0.00745048	0
225	SV121	Bacteria	Proteobacteria	Gammaproteobacteria	Alteromonadales	Shewanellaceae	Shewanella	0	0.000575444	0.00148404	0.00154461
226	SV123	Bacteria	Bacteroidota	Bacteroidia	Flavobacteriales	Flavobacteriaceae	Flavobacterium	0	0	0.00784421	0
227	SV125	Bacteria	Proteobacteria	Gammaproteobacteria	Alteromonadales	Shewanellaceae	Shewanella	0	0.000787449	0	0.00127203
228	SV128	Bacteria	Proteobacteria	Gammaproteobacteria	Pseudomonadales	Moraxellaceae	Acinetobacter	0	0	0.00781392	0
229	SV134	Bacteria	Proteobacteria	Gammaproteobacteria	Alteromonadales	Shewanellaceae	Shewanella	0	0.000817736	0.00060573	0.000726876
230	SV138	Bacteria	Bacteroidota	Bacteroidia	Flavobacteriales	Weeksellaceae	Empedobacter	0	0	0.00666303	0
231	SV139	Bacteria	Proteobacteria	Gammaproteobacteria	Pseudomonadales	Moraxellaceae	Acinetobacter	0	0.00163547	0	0
232	SV141	Bacteria	Proteobacteria	Gammaproteobacteria	Burkholderiales	Chitinibacteraceae	Iodobacter	0	0.000575444	0	0.00127203
233	SV143	Bacteria	Desulfobacterota	Desulfovibrionia	Desulfovibrionales	Desulfovibrionaceae	Desulfovibrio	0	0	0.00645103	0
234	SV145	Bacteria	Proteobacteria	Gammaproteobacteria	Burkholderiales	Comamonadaceae	Brachymonas	0	0	0.00496699	0
235	SV148	Bacteria	Firmicutes	Bacilli	Lactobacillales	Streptococcaceae	Lactococcus	0	0.00115089	0	0.000363438
236	SV153	Bacteria	Proteobacteria	Gammaproteobacteria	Aeromonadales	Aeromonadaceae	Aeromonas	0	0.000575444	0	0.000908595
237	SV154	Bacteria	Proteobacteria	Gammaproteobacteria	Pseudomonadales	Moraxellaceae	Acinetobacter	0	0.000363438	0	0.000969168
238	SV156	Bacteria	Proteobacteria	Gammaproteobacteria	Enterobacterales	Enterobacteriaceae	Plesiomonas	0	0.000302865	0.00248349	0.000908595
239	SV157	Bacteria	Proteobacteria	Gammaproteobacteria	Pseudomonadales	Pseudomonadaceae	Pseudomonas	0	0.000726876	0.000454298	0.00060573
240	SV159	Bacteria	Proteobacteria	Gammaproteobacteria	Alteromonadales	Shewanellaceae	Shewanella	0	0.000636017	0	0.000999455
241	SV161	Bacteria	Proteobacteria	Gammaproteobacteria	Burkholderiales	Oxalobacteraceae	Janthinobacterium	0	0.000636017	0.00196862	0.000363438
242	SV168	Bacteria	Proteobacteria	Gammaproteobacteria	Pseudomonadales	Moraxellaceae	Acinetobacter	0	0.000787449	0	0.000787449
243	SV171	Bacteria	Proteobacteria	Gammaproteobacteria	Burkholderiales	Chitinibacteraceae	Iodobacter	0	0.000363438	0	0.00121146
244	SV174	Bacteria	Proteobacteria	Gammaproteobacteria	Burkholderiales	Neisseriaceae	Uruburuella	0	0.000121146	0.00327094	6.0573e-05
245	SV178	Bacteria	Proteobacteria	Gammaproteobacteria	Pseudomonadales	Pseudomonadaceae	Pseudomonas	0	0.000787449	0	0.000787449
246	SV179	Bacteria	Firmicutes	Bacilli	Lactobacillales	Streptococcaceae	Streptococcus	0	0	0.0047247	0
247	SV184	Bacteria	Proteobacteria	Gammaproteobacteria	Enterobacterales	Enterobacteriaceae	Citrobacter	0	0.000302865	0.00263493	0.000242292
248	SV186	Bacteria	Firmicutes	Bacilli	Lactobacillales	Leuconostocaceae	Weissella	0	0	0	0.00166576
249	SV191	Bacteria	Proteobacteria	Gammaproteobacteria	Alteromonadales	Shewanellaceae	Shewanella	0	0.000212006	0	0.00121146
250	SV193	Bacteria	Proteobacteria	Gammaproteobacteria	Pseudomonadales	Moraxellaceae	Acinetobacter	0	0	0.00399782	0
251	SV196	Bacteria	Proteobacteria	Gammaproteobacteria	Alteromonadales	Shewanellaceae	Shewanella	0	0	0	0.00130232
252	SV197	Bacteria	Proteobacteria	Gammaproteobacteria	Pseudomonadales	Pseudomonadaceae	Pseudomonas	0	0.000908595	0	0.000393725
253	SV201	Bacteria	Firmicutes	Bacilli	Lactobacillales	Vagococcaceae	Vagococcus	0	0.000969168	0	0
254	SV202	Bacteria	Proteobacteria	Gammaproteobacteria	Aeromonadales	Aeromonadaceae	Aeromonas	0	0.000636017	0	0.000393725
255	SV204	Bacteria	Proteobacteria	Gammaproteobacteria	Aeromonadales	Aeromonadaceae	Aeromonas	0	0	0	0.00133261
256	SV205	Bacteria	Proteobacteria	Gammaproteobacteria	Pseudomonadales	Moraxellaceae	Acinetobacter	0	9.08595e-05	0.00333152	0
257	SV206	Bacteria	Proteobacteria	Gammaproteobacteria	Burkholderiales	Comamonadaceae	Rhodoferax	0	0	0.0033618	0
258	SV207	Bacteria	Firmicutes	Bacilli	Lactobacillales	Vagococcaceae	Vagococcus	0	0.000817736	0	0
259	SV211	Bacteria	Proteobacteria	Gammaproteobacteria	Pseudomonadales	Moraxellaceae	Acinetobacter	0	0.000302865	0	0.000666303
260	SV212	Bacteria	Proteobacteria	Gammaproteobacteria	Pseudomonadales	Moraxellaceae	Acinetobacter	0	0.000151433	0	0.000757163
261	SV217	Bacteria	Firmicutes	Bacilli	Lactobacillales	Leuconostocaceae	Weissella	0	0	0.00360409	0
262	SV218	Bacteria	Firmicutes	Bacilli	Staphylococcales	Staphylococcaceae	Macrococcus	0	0.00102974	0	0
263	SV219	Bacteria	Firmicutes	Bacilli	Lactobacillales	Streptococcaceae	Lactococcus	0	0.000333152	0	0.000848022
264	SV220	Bacteria	Proteobacteria	Gammaproteobacteria	Pseudomonadales	Moraxellaceae	Psychrobacter	0	0.000242292	0.00281665	0
265	SV225	Bacteria	Proteobacteria	Gammaproteobacteria	Burkholderiales	Comamonadaceae	Acidovorax	0	0	0.00287722	0
266	SV229	Bacteria	Firmicutes	Bacilli	Lactobacillales	Enterococcaceae	Enterococcus	0	0.000242292	0	0.000514871
267	SV233	Bacteria	Proteobacteria	Gammaproteobacteria	Alteromonadales	Shewanellaceae	Shewanella	0	0.000636017	0	0.000151433
268	SV234	Bacteria	Proteobacteria	Gammaproteobacteria	Enterobacterales	Erwiniaceae	Tatumella	0	0	0	0.000817736
269	SV237	Bacteria	Proteobacteria	Gammaproteobacteria	Pseudomonadales	Moraxellaceae	Psychrobacter	0	0.000817736	0	0.000181719
270	SV239	Bacteria	Bacteroidota	Bacteroidia	Flavobacteriales	Weeksellaceae	Soonwooa	0	0	0.0026955	0
271	SV240	Bacteria	Proteobacteria	Gammaproteobacteria	Burkholderiales	Comamonadaceae	Pelomonas	0	0	0.00242292	0
272	SV242	Bacteria	Proteobacteria	Gammaproteobacteria	Alteromonadales	Shewanellaceae	Shewanella	0	0.000454298	0	0.000424011
273	SV244	Bacteria	Fusobacteriota	Fusobacteriia	Fusobacteriales	Fusobacteriaceae	Fusobacterium	0	0	0.00239263	0
274	SV246	Bacteria	Proteobacteria	Gammaproteobacteria	Burkholderiales	Neisseriaceae	Uruburuella	0	0	0.0029075	0
275	SV247	Bacteria	Proteobacteria	Gammaproteobacteria	Aeromonadales	Aeromonadaceae	Aeromonas	0	0	0	0.000969168
276	SV249	Bacteria	Proteobacteria	Gammaproteobacteria	Pseudomonadales	Moraxellaceae	Acinetobacter	0	0	0.00215034	0
277	SV251	Bacteria	Firmicutes	Bacilli	Lactobacillales	Leuconostocaceae	Weissella	0	0.000333152	0	0.000575444
278	SV252	Bacteria	Bacteroidota	Bacteroidia	Bacteroidales	Barnesiellaceae	NA	0	0	0.00193834	0
279	SV253	Bacteria	Proteobacteria	Gammaproteobacteria	Enterobacterales	Morganellaceae	Providencia	0	0	0.00257435	0
280	SV256	Bacteria	Proteobacteria	Gammaproteobacteria	Enterobacterales	Enterobacteriaceae	NA	0	0	0.000757163	0.000514871
281	SV258	Bacteria	Firmicutes	Clostridia	Clostridiales	Clostridiaceae	Clostridium sensu stricto 1	0	0	0.00230177	0
282	SV262	Bacteria	Proteobacteria	Gammaproteobacteria	Burkholderiales	Alcaligenaceae	NA	0	0	0.00230177	0
283	SV263	Bacteria	Firmicutes	Bacilli	Lactobacillales	Leuconostocaceae	Leuconostoc	0	0.000454298	0	0.000242292
284	SV265	Bacteria	Proteobacteria	Gammaproteobacteria	Pseudomonadales	Moraxellaceae	Acinetobacter	0	0	0.00248349	0
285	SV266	Bacteria	Proteobacteria	Gammaproteobacteria	Burkholderiales	Neisseriaceae	NA	0	0	0.00275607	0
286	SV267	Bacteria	Firmicutes	Negativicutes	Acidaminococcales	Acidaminococcaceae	Phascolarctobacterium	0	0	0.00184748	0
287	SV271	Bacteria	Firmicutes	Bacilli	Bacillales	Planococcaceae	Kurthia	0	0.000181719	0	0.000302865
288	SV272	Bacteria	Proteobacteria	Gammaproteobacteria	Pseudomonadales	Moraxellaceae	Acinetobacter	0	0.000151433	0	0.000242292
289	SV273	Bacteria	Bacteroidota	Bacteroidia	Flavobacteriales	Flavobacteriaceae	Flavobacterium	0	0	0.00184748	0
290	SV274	Bacteria	Proteobacteria	Gammaproteobacteria	Burkholderiales	Comamonadaceae	Hydrogenophaga	0	0	0.00196862	0
291	SV276	Bacteria	Proteobacteria	Gammaproteobacteria	Pseudomonadales	Pseudomonadaceae	Pseudomonas	0	0.000424011	0	0
292	SV277	Bacteria	Proteobacteria	Gammaproteobacteria	Enterobacterales	Enterobacteriaceae	Lelliottia	0	0.000212006	0	0.000212006
293	SV278	Bacteria	Fusobacteriota	Fusobacteriia	Fusobacteriales	Fusobacteriaceae	Cetobacterium	0	0	0.00212006	0
294	SV279	Bacteria	Bacteroidota	Bacteroidia	Bacteroidales	Paludibacteraceae	NA	0	0	0.00205948	0
295	SV283	Bacteria	Proteobacteria	Gammaproteobacteria	Pseudomonadales	Moraxellaceae	Acinetobacter	0	0	0.00142347	0
296	SV285	Bacteria	Fusobacteriota	Fusobacteriia	Fusobacteriales	Fusobacteriaceae	Cetobacterium	0	0	0.00233206	0
297	SV286	Bacteria	Proteobacteria	Gammaproteobacteria	Burkholderiales	Chromobacteriaceae	Vogesella	0	0	0.0022412	0
298	SV287	Bacteria	Actinobacteriota	Actinobacteria	Micrococcales	Micrococcaceae	Rothia	0	0	0.00181719	0
299	SV289	Bacteria	Firmicutes	Bacilli	Lactobacillales	Leuconostocaceae	Weissella	0	0.000121146	0	0.000545157
300	SV290	Bacteria	Firmicutes	Bacilli	Lactobacillales	Vagococcaceae	Vagococcus	0	0	0.00184748	0
301	SV293	Bacteria	Proteobacteria	Gammaproteobacteria	Enterobacterales	Morganellaceae	Morganella	0	0	0.00175662	0
302	SV294	Bacteria	Proteobacteria	Gammaproteobacteria	Pseudomonadales	Moraxellaceae	Acinetobacter	0	0	0.00139318	0
303	SV297	Bacteria	Proteobacteria	Gammaproteobacteria	Burkholderiales	Comamonadaceae	Acidovorax	0	0	0.00148404	0
304	SV299	Bacteria	Proteobacteria	Alphaproteobacteria	Sphingomonadales	Sphingomonadaceae	Sphingomonas	0	0	0.00154461	0
305	SV300	Bacteria	Proteobacteria	Gammaproteobacteria	Enterobacterales	Hafniaceae	Edwardsiella	0	0	0.0015749	0
306	SV303	Bacteria	Proteobacteria	Gammaproteobacteria	Xanthomonadales	Xanthomonadaceae	Stenotrophomonas	0	0.000212006	0.000454298	0.000212006
307	SV304	Bacteria	Proteobacteria	Gammaproteobacteria	Burkholderiales	Aquaspirillaceae	Microvirgula	0	0	0.00148404	0
308	SV305	Bacteria	Proteobacteria	Gammaproteobacteria	Burkholderiales	Comamonadaceae	NA	0	0	0.00154461	0
309	SV306	Bacteria	Proteobacteria	Gammaproteobacteria	Enterobacterales	Enterobacteriaceae	Plesiomonas	0	0	0.00169604	0
310	SV307	Bacteria	Proteobacteria	Gammaproteobacteria	Methylococcales	Methylococcaceae	Methyloparacoccus	0	0	0.0020292	0
311	SV308	Bacteria	Firmicutes	Bacilli	Lactobacillales	Leuconostocaceae	Weissella	0	0	0	0.000666303
312	SV309	Bacteria	Proteobacteria	Gammaproteobacteria	Enterobacterales	Enterobacteriaceae	NA	0	0.000454298	0	0
313	SV310	Bacteria	Proteobacteria	Gammaproteobacteria	Burkholderiales	Comamonadaceae	Comamonas	0	0	0.00163547	0
314	SV313	Bacteria	Proteobacteria	Gammaproteobacteria	Xanthomonadales	Xanthomonadaceae	Arenimonas	0	0.000393725	0	0.000151433
315	SV314	Bacteria	Firmicutes	Clostridia	Lachnospirales	Lachnospiraceae	Blautia	0	9.08595e-05	0.000878309	0.000212006
316	SV315	Bacteria	Proteobacteria	Gammaproteobacteria	Pseudomonadales	Pseudomonadaceae	Pseudomonas	0	0	0.00181719	0
317	SV316	Bacteria	Bacteroidota	Bacteroidia	Flavobacteriales	Flavobacteriaceae	Flavobacterium	0	0	0.00160519	0
318	SV318	Bacteria	Proteobacteria	Gammaproteobacteria	Burkholderiales	Comamonadaceae	NA	0	0	0.00169604	0
319	SV319	Bacteria	Firmicutes	Bacilli	Lactobacillales	Vagococcaceae	Vagococcus	0	0	0	0.000514871
320	SV321	Bacteria	Proteobacteria	Gammaproteobacteria	Burkholderiales	Comamonadaceae	Rhodoferax	0	0	0.00109031	0
321	SV322	Bacteria	Proteobacteria	Gammaproteobacteria	Pseudomonadales	Moraxellaceae	Acinetobacter	0	0	0.00139318	0
322	SV324	Bacteria	Proteobacteria	Gammaproteobacteria	Pseudomonadales	Pseudomonadaceae	Pseudomonas	0	0.000272579	0	0.000151433
323	SV325	Bacteria	Firmicutes	Clostridia	Clostridiales	Clostridiaceae	NA	0	0	0.00169604	0
324	SV326	Bacteria	Firmicutes	Bacilli	Lactobacillales	Vagococcaceae	Vagococcus	0	0	0.00163547	0
325	SV327	Bacteria	Proteobacteria	Gammaproteobacteria	Burkholderiales	Comamonadaceae	Polaromonas	0	0	0.00124175	0
326	SV329	Bacteria	Bacteroidota	Bacteroidia	Bacteroidales	Rikenellaceae	Alistipes	0	0	0.00163547	0
327	SV330	Bacteria	Proteobacteria	Gammaproteobacteria	Enterobacterales	Enterobacteriaceae	NA	0	0	0	0.000484584
328	SV332	Bacteria	Proteobacteria	Gammaproteobacteria	Pseudomonadales	Pseudomonadaceae	Pseudomonas	0	0.000484584	0	0
329	SV333	Bacteria	Proteobacteria	Gammaproteobacteria	Pseudomonadales	Moraxellaceae	Acinetobacter	0	0.000151433	0	0.000181719
330	SV334	Bacteria	Firmicutes	Clostridia	Peptostreptococcales-Tissierellales	Peptostreptococcaceae	Peptostreptococcus	0	3.02865e-05	0.000424011	0.000302865
331	SV335	Bacteria	Proteobacteria	Gammaproteobacteria	Pseudomonadales	Moraxellaceae	Acinetobacter	0	0	0.00106003	0
332	SV336	Bacteria	Bacteroidota	Bacteroidia	Flavobacteriales	Flavobacteriaceae	Flavobacterium	0	0	0.00133261	0
333	SV337	Bacteria	Proteobacteria	Alphaproteobacteria	Rhodobacterales	Rhodobacteraceae	Gemmobacter	0	0	0.00187776	0
334	SV338	Bacteria	Proteobacteria	Gammaproteobacteria	Enterobacterales	Enterobacteriaceae	NA	0	0	0	0.000575444
335	SV339	Bacteria	Proteobacteria	Gammaproteobacteria	Pseudomonadales	Moraxellaceae	Acinetobacter	0	0	0	0.000333152
336	SV340	Bacteria	Bacteroidota	Bacteroidia	Bacteroidales	Bacteroidaceae	Bacteroides	0	0	0.00151433	0
337	SV341	Bacteria	Bacteroidota	Bacteroidia	Bacteroidales	Dysgonomonadaceae	Dysgonomonas	0	0	0.00118117	0
338	SV342	Bacteria	Proteobacteria	Gammaproteobacteria	Aeromonadales	Aeromonadaceae	Aeromonas	0	0	0	0.000636017
339	SV343	Bacteria	Firmicutes	Bacilli	Lactobacillales	Vagococcaceae	Vagococcus	0	0	0.00121146	0
340	SV344	Bacteria	Proteobacteria	Gammaproteobacteria	Burkholderiales	Neisseriaceae	Vitreoscilla	0	0	0.00127203	0
341	SV345	Bacteria	Proteobacteria	Gammaproteobacteria	Burkholderiales	Chromobacteriaceae	Vogesella	0	0	0.00142347	0
342	SV346	Bacteria	Bacteroidota	Bacteroidia	Bacteroidales	Bacteroidaceae	Bacteroides	0	0	0.00142347	0
343	SV347	Bacteria	Desulfobacterota	Desulfovibrionia	Desulfovibrionales	Desulfovibrionaceae	Desulfovibrio	0	0	0.00109031	0
344	SV348	Bacteria	Firmicutes	Bacilli	Erysipelotrichales	Erysipelotrichaceae	Solobacterium	0	0	0.00142347	0
345	SV349	Bacteria	Firmicutes	Bacilli	Bacillales	Planococcaceae	Kurthia	0	0	0.00109031	0
346	SV350	Bacteria	Proteobacteria	Gammaproteobacteria	Pseudomonadales	Moraxellaceae	Enhydrobacter	0	0	0.00142347	0
347	SV351	Bacteria	Proteobacteria	Gammaproteobacteria	Enterobacterales	Morganellaceae	Morganella	0	0	0.00148404	0
348	SV352	Bacteria	Proteobacteria	Gammaproteobacteria	Pseudomonadales	Moraxellaceae	Acinetobacter	0	0	0	0.000575444
349	SV353	Bacteria	Proteobacteria	Gammaproteobacteria	Burkholderiales	Comamonadaceae	Hydrogenophaga	0	0	0.0011206	0
350	SV354	Bacteria	Proteobacteria	Gammaproteobacteria	Burkholderiales	Comamonadaceae	Comamonas	0	0	0.00139318	0
351	SV355	Bacteria	Proteobacteria	Gammaproteobacteria	Pseudomonadales	Moraxellaceae	Acinetobacter	0	0	0.00121146	0
352	SV356	Bacteria	Proteobacteria	Gammaproteobacteria	Enterobacterales	Yersiniaceae	Yersinia	0	0	0	0.000484584
353	SV357	Bacteria	Firmicutes	Bacilli	Lactobacillales	Vagococcaceae	Vagococcus	0	0.000242292	0	0
354	SV358	Bacteria	Bacteroidota	Bacteroidia	Flavobacteriales	Weeksellaceae	Chryseobacterium	0	0.000181719	0	0
355	SV359	Bacteria	Firmicutes	Bacilli	Lactobacillales	Vagococcaceae	Vagococcus	0	0.000181719	0	0.000212006
356	SV360	Bacteria	Firmicutes	Clostridia	Peptostreptococcales-Tissierellales	Peptostreptococcaceae	Proteocatella	0	0	0.00106003	0
357	SV361	Bacteria	Proteobacteria	Gammaproteobacteria	Pseudomonadales	Moraxellaceae	Acinetobacter	0	0	0.00115089	0
358	SV362	Bacteria	Fusobacteriota	Fusobacteriia	Fusobacteriales	Fusobacteriaceae	Cetobacterium	0	0	0.0011206	0
359	SV363	Bacteria	Proteobacteria	Gammaproteobacteria	Pseudomonadales	Moraxellaceae	Psychrobacter	0	0	0.00115089	0
360	SV364	Bacteria	Firmicutes	Bacilli	Lactobacillales	Streptococcaceae	Lactococcus	0	9.08595e-05	0	0.000212006
361	SV365	Bacteria	Bacteroidota	Bacteroidia	Flavobacteriales	Flavobacteriaceae	Flavobacterium	0	0	0.00130232	0
362	SV366	Bacteria	Proteobacteria	Gammaproteobacteria	Alteromonadales	Shewanellaceae	Shewanella	0	0	0.000848022	0.000272579
363	SV367	Bacteria	Firmicutes	Bacilli	Lactobacillales	Vagococcaceae	Vagococcus	0	0	0.000999455	0
364	SV368	Bacteria	Firmicutes	Bacilli	Lactobacillales	Carnobacteriaceae	Carnobacterium	0	0	0.00109031	0
365	SV369	Bacteria	Desulfobacterota	Desulfovibrionia	Desulfovibrionales	Desulfovibrionaceae	Bilophila	0	0	0.000817736	0
366	SV370	Bacteria	Proteobacteria	Gammaproteobacteria	Pseudomonadales	Moraxellaceae	Psychrobacter	0	0	0.000787449	0
367	SV371	Bacteria	Firmicutes	Bacilli	Lactobacillales	Streptococcaceae	Streptococcus	0	0	0.000969168	0
368	SV372	Bacteria	Proteobacteria	Gammaproteobacteria	Alteromonadales	Shewanellaceae	Shewanella	0	0	0	0.000454298
369	SV373	Bacteria	Proteobacteria	Gammaproteobacteria	Pseudomonadales	Pseudomonadaceae	Pseudomonas	0	0.000484584	0	0
370	SV374	Bacteria	Firmicutes	Bacilli	Exiguobacterales	Exiguobacteraceae	Exiguobacterium	0	0.000121146	0	0.000333152
371	SV375	Bacteria	Actinobacteriota	Actinobacteria	Actinomycetales	Actinomycetaceae	NA	0	0	0.000969168	0
372	SV376	Bacteria	Firmicutes	Clostridia	Lachnospirales	Lachnospiraceae	NA	0	0	0.000787449	0
373	SV377	Bacteria	Bacteroidota	Bacteroidia	Flavobacteriales	Weeksellaceae	Chryseobacterium	0	0	0.000908595	0
374	SV378	Bacteria	Bacteroidota	Bacteroidia	Flavobacteriales	Weeksellaceae	NA	0	0	0.00124175	0
375	SV379	Bacteria	Bacteroidota	Bacteroidia	Bacteroidales	Tannerellaceae	Parabacteroides	0	0	0.000969168	0
376	SV380	Bacteria	Bacteroidota	Bacteroidia	Flavobacteriales	Flavobacteriaceae	Myroides	0	0	0	0.000272579
377	SV381	Bacteria	Desulfobacterota	Desulfovibrionia	Desulfovibrionales	Desulfovibrionaceae	Bilophila	0	0	0.00121146	0
378	SV383	Bacteria	Bacteroidota	Bacteroidia	Sphingobacteriales	Sphingobacteriaceae	Nubsella	0	0	0.00106003	0
379	SV384	Bacteria	Proteobacteria	Gammaproteobacteria	Pseudomonadales	Moraxellaceae	Acinetobacter	0	0.000181719	0	0
380	SV385	Bacteria	Bacteroidota	Bacteroidia	Bacteroidales	Rikenellaceae	Alistipes	0	0	0.00109031	0
381	SV386	Bacteria	Proteobacteria	Gammaproteobacteria	Xanthomonadales	Xanthomonadaceae	Stenotrophomonas	0	0	0.000757163	0
382	SV387	Bacteria	Firmicutes	Bacilli	Lactobacillales	Streptococcaceae	Streptococcus	0	0	0.00102974	0
383	SV388	Bacteria	Proteobacteria	Gammaproteobacteria	Enterobacterales	Yersiniaceae	Yersinia	0	0.000212006	0	0
384	SV390	Bacteria	Proteobacteria	Gammaproteobacteria	Burkholderiales	Comamonadaceae	Comamonas	0	0	0.000908595	0
385	SV392	Bacteria	Bacteroidota	Bacteroidia	Bacteroidales	Bacteroidaceae	Bacteroides	0	0	0.000636017	0
386	SV393	Bacteria	Proteobacteria	Gammaproteobacteria	Pseudomonadales	Moraxellaceae	Acinetobacter	0	0	0.00124175	0
387	SV394	Bacteria	Firmicutes	Bacilli	Lactobacillales	Leuconostocaceae	Weissella	0	0	0	0.000272579
388	SV395	Bacteria	Firmicutes	Bacilli	Bacillales	Planococcaceae	Lysinibacillus	0	0	0	0.000272579
389	SV396	Bacteria	Bacteroidota	Bacteroidia	Flavobacteriales	Weeksellaceae	NA	0	0	0.000575444	0
390	SV397	Bacteria	Bacteroidota	Bacteroidia	Bacteroidales	Bacteroidaceae	Bacteroides	0	0	0.000848022	0
391	SV398	Bacteria	Bacteroidota	Bacteroidia	Flavobacteriales	Weeksellaceae	Chryseobacterium	0	0	0.00118117	0
392	SV400	Bacteria	Proteobacteria	Gammaproteobacteria	Enterobacterales	Enterobacteriaceae	Enterobacter	0	0	0	0.000393725
393	SV401	Bacteria	Proteobacteria	Gammaproteobacteria	Pseudomonadales	Pseudomonadaceae	Pseudomonas	0	0.000212006	0	0
394	SV402	Bacteria	Bacteroidota	Bacteroidia	Bacteroidales	Dysgonomonadaceae	NA	0	9.08595e-05	0	9.08595e-05
395	SV403	Bacteria	Proteobacteria	Gammaproteobacteria	Burkholderiales	Rhodocyclaceae	Dechloromonas	0	0	0.0011206	0
396	SV404	Bacteria	Bacteroidota	Bacteroidia	Cytophagales	Spirosomaceae	Arcicella	0	0	0.00102974	0
397	SV405	Bacteria	Firmicutes	Bacilli	Erysipelotrichales	Erysipelotrichaceae	[Anaerorhabdus] furcosa group	0	0	0.000817736	0
398	SV406	Bacteria	Bacteroidota	Bacteroidia	Bacteroidales	Bacteroidaceae	Bacteroides	0	0	0.000726876	0
399	SV407	Bacteria	Proteobacteria	Alphaproteobacteria	Rhizobiales	Devosiaceae	NA	0	0	0.000757163	0
400	SV408	Bacteria	Proteobacteria	Gammaproteobacteria	Aeromonadales	Aeromonadaceae	Aeromonas	0	0	0	9.08595e-05
401	SV409	Bacteria	Proteobacteria	Gammaproteobacteria	Pseudomonadales	Moraxellaceae	Acinetobacter	0	0	0	0.000454298
402	SV411	Bacteria	Proteobacteria	Alphaproteobacteria	Sphingomonadales	Sphingomonadaceae	Sphingomonas	0	0	0.000878309	0
403	SV412	Bacteria	Bacteroidota	Bacteroidia	Flavobacteriales	Weeksellaceae	Bergeyella	0	0	0.000938882	0
404	SV413	Bacteria	Synergistota	Synergistia	Synergistales	Synergistaceae	NA	0	0	0.000848022	0
405	SV414	Bacteria	Firmicutes	Bacilli	Erysipelotrichales	Erysipelotrichaceae	Erysipelotrichaceae UCG-006	0	0	0.00060573	0
406	SV415	Bacteria	Proteobacteria	Gammaproteobacteria	Pseudomonadales	Moraxellaceae	Acinetobacter	0	0	0.000878309	0
407	SV416	Bacteria	Bacteroidota	Bacteroidia	Sphingobacteriales	Sphingobacteriaceae	Sphingobacterium	0	0.000212006	0	0
408	SV417	Bacteria	Proteobacteria	Gammaproteobacteria	Pseudomonadales	Moraxellaceae	Acinetobacter	0	0	0.000848022	0
409	SV418	Bacteria	Firmicutes	Clostridia	Clostridiales	Clostridiaceae	Clostridium sensu stricto 1	0	0	0.000757163	0
410	SV419	Bacteria	Proteobacteria	Gammaproteobacteria	Alteromonadales	Shewanellaceae	Shewanella	0	0	0.000999455	0
411	SV420	Bacteria	Deinococcota	Deinococci	Deinococcales	Deinococcaceae	Deinococcus	0	0	0.000726876	0
412	SV421	Bacteria	Bacteroidota	Bacteroidia	Bacteroidales	Bacteroidaceae	Bacteroides	0	0	0.000938882	0
413	SV422	Bacteria	Actinobacteriota	Actinobacteria	Micrococcales	Micrococcaceae	NA	0	0	0.000545157	0
414	SV423	Bacteria	Proteobacteria	Gammaproteobacteria	Pseudomonadales	Moraxellaceae	Psychrobacter	0	0.000151433	0	0
415	SV424	Bacteria	Proteobacteria	Gammaproteobacteria	Pseudomonadales	Moraxellaceae	Acinetobacter	0	0	0.000787449	0
416	SV425	Bacteria	Actinobacteriota	Actinobacteria	Propionibacteriales	Nocardioidaceae	Nocardioides	0	0	0.000575444	0
417	SV426	Bacteria	Bacteroidota	Bacteroidia	Flavobacteriales	Weeksellaceae	Chryseobacterium	0	0	0.000575444	0
418	SV427	Bacteria	Proteobacteria	Gammaproteobacteria	Pseudomonadales	Moraxellaceae	Acinetobacter	0	0	0.000726876	0
419	SV428	Bacteria	Proteobacteria	Alphaproteobacteria	Acetobacterales	Acetobacteraceae	Gluconobacter	0	0	0	0.000302865
420	SV429	Bacteria	Firmicutes	Bacilli	Lactobacillales	Leuconostocaceae	Leuconostoc	0	0	0	0.000393725
421	SV433	Bacteria	Firmicutes	Bacilli	Lactobacillales	Vagococcaceae	Vagococcus	0	0.000333152	0	0
422	SV434	Bacteria	Proteobacteria	Alphaproteobacteria	Rhodobacterales	Rhodobacteraceae	Rhodobacter	0	6.0573e-05	0	0.000242292
423	SV435	Bacteria	Proteobacteria	Gammaproteobacteria	Pseudomonadales	Moraxellaceae	NA	0	3.02865e-05	0	0.000121146
424	SV436	Bacteria	Firmicutes	Bacilli	Erysipelotrichales	Erysipelotrichaceae	Turicibacter	0	0	0.00069659	0
425	SV437	Bacteria	Firmicutes	Negativicutes	Veillonellales-Selenomonadales	Sporomusaceae	Pelosinus	0	0	0.000757163	0
426	SV438	Bacteria	Firmicutes	Bacilli	Erysipelotrichales	Erysipelotrichaceae	Solobacterium	0	0	0.000878309	0
427	SV439	Bacteria	Proteobacteria	Gammaproteobacteria	Burkholderiales	Oxalobacteraceae	Undibacterium	0	0	0.00069659	0
428	SV440	Bacteria	Proteobacteria	Gammaproteobacteria	Enterobacterales	Enterobacteriaceae	NA	0	0	0.000848022	0
429	SV441	Bacteria	Proteobacteria	Alphaproteobacteria	Rhodobacterales	Rhodobacteraceae	Paracoccus	0	0	0	0.000272579
430	SV442	Bacteria	Proteobacteria	Alphaproteobacteria	Rhizobiales	Rhizobiaceae	Brucella	0	6.0573e-05	0	6.0573e-05
431	SV443	Bacteria	Bacteroidota	Bacteroidia	Flavobacteriales	Weeksellaceae	Cloacibacterium	0	0	0.000787449	0
432	SV444	Bacteria	Proteobacteria	Gammaproteobacteria	Pseudomonadales	Moraxellaceae	Acinetobacter	0	0	0	0.000212006
433	SV445	Bacteria	Bacteroidota	Bacteroidia	Flavobacteriales	Flavobacteriaceae	Myroides	0	0.000121146	0	0
434	SV446	Bacteria	Firmicutes	Clostridia	Lachnospirales	Lachnospiraceae	Epulopiscium	0	0	0.000514871	0
435	SV447	Bacteria	Spirochaetota	Spirochaetia	Spirochaetales	Spirochaetaceae	Treponema	0	0	0.000393725	0
436	SV448	Bacteria	Proteobacteria	Gammaproteobacteria	Enterobacterales	Enterobacteriaceae	Plesiomonas	0	0	0.000636017	0
437	SV449	Bacteria	Desulfobacterota	Desulfovibrionia	Desulfovibrionales	Desulfovibrionaceae	NA	0	0	0.000636017	0
438	SV450	Bacteria	Actinobacteriota	Actinobacteria	Corynebacteriales	Corynebacteriaceae	Corynebacterium	0	0.000242292	0	0
439	SV451	Bacteria	Firmicutes	Clostridia	Peptostreptococcales-Tissierellales	Peptostreptococcaceae	Proteocatella	0	0	0.000666303	0
440	SV452	Bacteria	Firmicutes	Clostridia	Clostridiales	Clostridiaceae	NA	0	0	0	0.000272579
441	SV455	Bacteria	Proteobacteria	Gammaproteobacteria	Aeromonadales	Aeromonadaceae	Aeromonas	0	0.000212006	0	0
442	SV456	Bacteria	Proteobacteria	Gammaproteobacteria	Enterobacterales	Hafniaceae	Hafnia-Obesumbacterium	0	0.000151433	0	0
443	SV457	Bacteria	Proteobacteria	Gammaproteobacteria	Pseudomonadales	Moraxellaceae	Enhydrobacter	0	0.000151433	0.000272579	3.02865e-05
444	SV458	Bacteria	Proteobacteria	Gammaproteobacteria	Pasteurellales	Pasteurellaceae	NA	0	0	0.00069659	0
445	SV459	Bacteria	Firmicutes	Clostridia	Clostridiales	Clostridiaceae	Clostridium sensu stricto 1	0	0	0.000666303	0
446	SV460	Bacteria	Desulfobacterota	Desulfovibrionia	Desulfovibrionales	Desulfovibrionaceae	Desulfovibrio	0	0	0.000636017	0
447	SV461	Bacteria	Proteobacteria	Gammaproteobacteria	Pseudomonadales	Moraxellaceae	Acinetobacter	0	0	0.000666303	0
448	SV462	Bacteria	Proteobacteria	Gammaproteobacteria	Burkholderiales	Chromobacteriaceae	Crenobacter	0	0	0	0.000181719
449	SV463	Bacteria	Proteobacteria	Gammaproteobacteria	Alteromonadales	Shewanellaceae	Shewanella	0	0	0	0.000212006
450	SV464	Bacteria	Proteobacteria	Alphaproteobacteria	Sphingomonadales	Sphingomonadaceae	NA	0	0	0.000575444	0
451	SV465	Bacteria	Bacteroidota	Bacteroidia	Cytophagales	Spirosomaceae	Flectobacillus	0	0	0.000545157	0
452	SV466	Bacteria	Bacteroidota	Bacteroidia	Sphingobacteriales	Sphingobacteriaceae	Sphingobacterium	0	0	0.000484584	0
453	SV467	Bacteria	Bacteroidota	Bacteroidia	Flavobacteriales	Weeksellaceae	NA	0	0	0.000575444	0
454	SV468	Bacteria	Firmicutes	Bacilli	Lactobacillales	Streptococcaceae	Streptococcus	0	0	0.00060573	0
455	SV469	Bacteria	Proteobacteria	Gammaproteobacteria	Burkholderiales	Comamonadaceae	NA	0	0	0.000726876	0
456	SV470	Bacteria	Proteobacteria	Gammaproteobacteria	Pseudomonadales	Pseudomonadaceae	Pseudomonas	0	0	0	0.000151433
457	SV472	Bacteria	Proteobacteria	Gammaproteobacteria	Xanthomonadales	Rhodanobacteraceae	Dokdonella	0	0.000181719	0	0
458	SV473	Bacteria	Proteobacteria	Gammaproteobacteria	Xanthomonadales	Xanthomonadaceae	Thermomonas	0	9.08595e-05	0	0.000121146
459	SV474	Bacteria	Proteobacteria	Gammaproteobacteria	Aeromonadales	Aeromonadaceae	Aeromonas	0	0	0	0.000151433
460	SV475	Bacteria	Proteobacteria	Gammaproteobacteria	Burkholderiales	Comamonadaceae	Comamonas	0	0	0	0.000151433
461	SV477	Bacteria	Bacteroidota	Bacteroidia	Flavobacteriales	Flavobacteriaceae	Flavobacterium	0	0	0.000575444	0
462	SV478	Bacteria	Actinobacteriota	Actinobacteria	Micrococcales	Microbacteriaceae	Leucobacter	0	0	0.000454298	0
463	SV479	Bacteria	Proteobacteria	Gammaproteobacteria	Pseudomonadales	Moraxellaceae	Acinetobacter	0	0	0.000514871	0
464	SV480	Bacteria	Bacteroidota	Bacteroidia	Flavobacteriales	Flavobacteriaceae	Myroides	0	0	0	0.000121146
465	SV481	Bacteria	Proteobacteria	Gammaproteobacteria	Enterobacterales	Enterobacteriaceae	NA	0	3.02865e-05	0	0
466	SV482	Bacteria	Firmicutes	Clostridia	Lachnospirales	Lachnospiraceae	XBB1006	0	0.000181719	0	0
467	SV483	Bacteria	Bacteroidota	Bacteroidia	Flavobacteriales	Flavobacteriaceae	Myroides	0	0	0.000302865	0
468	SV484	Bacteria	Actinobacteriota	Actinobacteria	Micrococcales	Dermatophilaceae	NA	0	0	0.00060573	0
469	SV485	Bacteria	Verrucomicrobiota	Verrucomicrobiae	Verrucomicrobiales	DEV007	NA	0	0	0.000636017	0
470	SV486	Bacteria	Bacteroidota	Bacteroidia	Bacteroidales	Williamwhitmaniaceae	Acetobacteroides	0	0	0.00060573	0
471	SV487	Bacteria	Bacteroidota	Bacteroidia	Bacteroidales	Bacteroidaceae	Bacteroides	0	0	0.000272579	0
472	SV488	Bacteria	Bacteroidota	Bacteroidia	Bacteroidales	Rikenellaceae	dgA-11 gut group	0	0	0.000272579	0
473	SV489	Bacteria	Proteobacteria	Gammaproteobacteria	Pseudomonadales	Moraxellaceae	Acinetobacter	0	0.000181719	0	0
474	SV490	Bacteria	Bacteroidota	Bacteroidia	Flavobacteriales	Weeksellaceae	NA	0	6.0573e-05	0	0.000121146
475	SV491	Bacteria	Proteobacteria	Gammaproteobacteria	Pseudomonadales	Moraxellaceae	Acinetobacter	0	0	0.000545157	0
476	SV492	Bacteria	Firmicutes	Bacilli	Erysipelotrichales	Erysipelatoclostridiaceae	NA	0	0	0.00060573	0
477	SV493	Bacteria	Firmicutes	Negativicutes	Veillonellales-Selenomonadales	Selenomonadaceae	NA	0	0	0.000514871	0
478	SV494	Bacteria	Synergistota	Synergistia	Synergistales	Synergistaceae	Cloacibacillus	0	0	0.000514871	0
479	SV495	Bacteria	Proteobacteria	Gammaproteobacteria	Pseudomonadales	Moraxellaceae	Acinetobacter	0	6.0573e-05	0	0
480	SV496	Bacteria	Proteobacteria	Gammaproteobacteria	Enterobacterales	Enterobacteriaceae	Escherichia-Shigella	0	3.02865e-05	0	0
481	SV497	Bacteria	Firmicutes	Bacilli	Lactobacillales	Leuconostocaceae	Leuconostoc	0	9.08595e-05	0	0
482	SV498	Bacteria	Proteobacteria	Gammaproteobacteria	Xanthomonadales	Xanthomonadaceae	Stenotrophomonas	0	0	0.000393725	0
483	SV499	Bacteria	Bacteroidota	Bacteroidia	Bacteroidales	Bacteroidaceae	Bacteroides	0	0	0.000545157	0
484	SV500	Bacteria	Synergistota	Synergistia	Synergistales	Synergistaceae	Cloacibacillus	0	0	0.000514871	0
485	SV501	Bacteria	Proteobacteria	Gammaproteobacteria	Pseudomonadales	Moraxellaceae	Acinetobacter	0	0	0.000484584	0
486	SV503	Bacteria	Bacteroidota	Bacteroidia	Flavobacteriales	Weeksellaceae	Chryseobacterium	0	0	0.000242292	0
487	SV505	Bacteria	Proteobacteria	Gammaproteobacteria	Xanthomonadales	Xanthomonadaceae	Stenotrophomonas	0	0	0	0.000272579
488	SV506	Bacteria	Proteobacteria	Gammaproteobacteria	Enterobacterales	Yersiniaceae	NA	0	6.0573e-05	0	0
489	SV507	Bacteria	Proteobacteria	Gammaproteobacteria	Burkholderiales	Rhodocyclaceae	Azoarcus	0	6.0573e-05	0	0
490	SV509	Bacteria	Proteobacteria	Gammaproteobacteria	Pseudomonadales	Moraxellaceae	Acinetobacter	0	0	0.000545157	0
491	SV510	Bacteria	Proteobacteria	Gammaproteobacteria	Pseudomonadales	Moraxellaceae	Acinetobacter	0	0	0.000484584	0
492	SV511	Bacteria	Bacteroidota	Bacteroidia	Bacteroidales	Bacteroidaceae	Bacteroides	0	0	0.000454298	0
493	SV512	Bacteria	Firmicutes	Clostridia	Eubacteriales	Eubacteriaceae	NA	0	0	0.000514871	0
494	SV513	Bacteria	Proteobacteria	Gammaproteobacteria	Xanthomonadales	Xanthomonadaceae	Stenotrophomonas	0	6.0573e-05	0	0
495	SV514	Bacteria	Proteobacteria	Gammaproteobacteria	Xanthomonadales	Rhodanobacteraceae	Pseudofulvimonas	0	0.000181719	0	0
496	SV515	Bacteria	Proteobacteria	Gammaproteobacteria	Burkholderiales	Comamonadaceae	Acidovorax	0	0.000121146	0	0
497	SV516	Bacteria	Proteobacteria	Gammaproteobacteria	Enterobacterales	Enterobacteriaceae	Klebsiella	0	6.0573e-05	0	0
498	SV517	Bacteria	Proteobacteria	Gammaproteobacteria	Enterobacterales	Enterobacteriaceae	Raoultella	0	9.08595e-05	0	3.02865e-05
499	SV518	Bacteria	Actinobacteriota	Actinobacteria	Micrococcales	Dermabacteraceae	Brachybacterium	0	0	0.000454298	0
500	SV519	Bacteria	Firmicutes	Bacilli	Lactobacillales	Enterococcaceae	Enterococcus	0	0	0.000393725	0
501	SV520	Bacteria	Bacteroidota	Bacteroidia	Bacteroidales	Marinifilaceae	Butyricimonas	0	0	0.000272579	0
502	SV521	Bacteria	Proteobacteria	Gammaproteobacteria	Burkholderiales	Burkholderiaceae	Limnobacter	0	0	0.000393725	0
503	SV522	Bacteria	Proteobacteria	Gammaproteobacteria	Cardiobacteriales	Wohlfahrtiimonadaceae	NA	0	0	0	6.0573e-05
504	SV524	Bacteria	Proteobacteria	Gammaproteobacteria	Pseudomonadales	Moraxellaceae	NA	0	0.000151433	0	0
505	SV525	Bacteria	Proteobacteria	Gammaproteobacteria	Pseudomonadales	Moraxellaceae	Acinetobacter	0	6.0573e-05	0	0
506	SV526	Bacteria	Proteobacteria	Gammaproteobacteria	Pseudomonadales	Moraxellaceae	Psychrobacter	0	0.000121146	0	0
507	SV527	Bacteria	Firmicutes	Clostridia	Peptostreptococcales-Tissierellales	Finegoldia	NA	0	0	0.000333152	0
508	SV528	Bacteria	Firmicutes	Bacilli	Erysipelotrichales	Erysipelotrichaceae	Solobacterium	0	0	0.000424011	0
509	SV529	Bacteria	Firmicutes	Bacilli	Acholeplasmatales	Acholeplasmataceae	NA	0	0	0.000242292	0
510	SV530	Bacteria	Proteobacteria	Gammaproteobacteria	Pseudomonadales	Pseudomonadaceae	Pseudomonas	0	0	0.000545157	0
511	SV531	Bacteria	Bacteroidota	Bacteroidia	Flavobacteriales	Weeksellaceae	Chryseobacterium	0	0	0.000454298	0
512	SV532	Bacteria	Proteobacteria	Gammaproteobacteria	Burkholderiales	Neisseriaceae	Vitreoscilla	0	0	0.000393725	0
513	SV533	Bacteria	Proteobacteria	Gammaproteobacteria	Burkholderiales	Burkholderiales Incertae Sedis	2013Ark19i	0	0	0.000363438	0
514	SV534	Bacteria	Proteobacteria	Gammaproteobacteria	Pseudomonadales	Moraxellaceae	Psychrobacter	0	0	0	0.000121146
515	SV536	Bacteria	Actinobacteriota	Actinobacteria	Micrococcales	Micrococcaceae	Glutamicibacter	0	6.0573e-05	0	0
516	SV537	Bacteria	Firmicutes	Clostridia	Oscillospirales	Ruminococcaceae	Faecalibacterium	0	0.000121146	0	0
517	SV538	Bacteria	Bacteroidota	Bacteroidia	Flavobacteriales	Flavobacteriaceae	Myroides	0	0.000181719	0	0
518	SV541	Bacteria	Bacteroidota	Bacteroidia	Bacteroidales	Rikenellaceae	dgA-11 gut group	0	0	0.000514871	0
519	SV542	Bacteria	Proteobacteria	Alphaproteobacteria	Sphingomonadales	Sphingomonadaceae	SD04E11	0	0	0.000212006	0
520	SV543	Bacteria	Firmicutes	Bacilli	Lactobacillales	Leuconostocaceae	Weissella	0	0	0.000212006	0
521	SV544	Bacteria	Firmicutes	Clostridia	Peptostreptococcales-Tissierellales	Peptostreptococcaceae	Proteocatella	0	0	0	3.02865e-05
522	SV545	Bacteria	Proteobacteria	Gammaproteobacteria	Aeromonadales	JI49D030	NA	0	0	0	0.000181719
523	SV547	Bacteria	Proteobacteria	Alphaproteobacteria	Sphingomonadales	Sphingomonadaceae	Sphingobium	0	9.08595e-05	0	0
524	SV548	Bacteria	Bacteroidota	Bacteroidia	Flavobacteriales	Weeksellaceae	Chryseobacterium	0	6.0573e-05	0	0
525	SV549	Bacteria	Proteobacteria	Gammaproteobacteria	Xanthomonadales	Xanthomonadaceae	Luteimonas	0	6.0573e-05	0	0
526	SV550	Bacteria	Proteobacteria	Alphaproteobacteria	Rhizobiales	Devosiaceae	Pelagibacterium	0	6.0573e-05	0	0
527	SV551	Bacteria	Bacteroidota	Bacteroidia	Bacteroidales	Bacteroidaceae	Bacteroides	0	0	0.000302865	0
528	SV552	Bacteria	Bacteroidota	Bacteroidia	Bacteroidales	Dysgonomonadaceae	Petrimonas	0	0	0.000484584	0
529	SV554	Bacteria	Proteobacteria	Gammaproteobacteria	Pseudomonadales	Moraxellaceae	Acinetobacter	0	0	0	3.02865e-05
530	SV556	Bacteria	Actinobacteriota	Actinobacteria	Corynebacteriales	Dietziaceae	Dietzia	0	0.000121146	0	0
531	SV557	Bacteria	Bacteroidota	Bacteroidia	Flavobacteriales	Weeksellaceae	Chryseobacterium	0	9.08595e-05	0	0
532	SV560	Bacteria	Firmicutes	Bacilli	Lactobacillales	Streptococcaceae	Floricoccus	0	0	0.000242292	0
533	SV561	Bacteria	Firmicutes	Clostridia	Christensenellales	Christensenellaceae	NA	0	0	0.000212006	0
534	SV563	Bacteria	Proteobacteria	Gammaproteobacteria	Burkholderiales	Chromobacteriaceae	Vogesella	0	0	0.000302865	0
535	SV564	Bacteria	Bacteroidota	Bacteroidia	Flavobacteriales	Crocinitomicaceae	Fluviicola	0	0	0.000302865	0
536	SV565	Bacteria	Bacteroidota	Bacteroidia	Bacteroidales	Rikenellaceae	Rikenella	0	0	0.000272579	0
537	SV566	Bacteria	Firmicutes	Clostridia	Lachnospirales	Lachnospiraceae	Agathobacter	0	0	0	6.0573e-05
538	SV567	Bacteria	Proteobacteria	Gammaproteobacteria	Burkholderiales	Neisseriaceae	NA	0	0	0	0.000212006
539	SV568	Bacteria	Proteobacteria	Gammaproteobacteria	Burkholderiales	Chitinibacteraceae	Iodobacter	0	0	0	9.08595e-05
540	SV569	Bacteria	Proteobacteria	Gammaproteobacteria	Aeromonadales	JI49D030	NA	0	0	0	3.02865e-05
541	SV570	Bacteria	Proteobacteria	Gammaproteobacteria	Pseudomonadales	Moraxellaceae	Acinetobacter	0	0	0	3.02865e-05
542	SV571	Bacteria	Proteobacteria	Gammaproteobacteria	Burkholderiales	Comamonadaceae	Alicycliphilus	0	0	0	0.000121146
543	SV572	Bacteria	Proteobacteria	Gammaproteobacteria	Alteromonadales	Alteromonadaceae	Rheinheimera	0	0	0	6.0573e-05
544	SV573	Bacteria	Deinococcota	Deinococci	Deinococcales	Deinococcaceae	Deinococcus	0	6.0573e-05	0	0
545	SV575	Bacteria	Proteobacteria	Gammaproteobacteria	Xanthomonadales	Xanthomonadaceae	Thermomonas	0	0.000151433	0	0
546	SV577	Bacteria	Verrucomicrobiota	Verrucomicrobiae	Verrucomicrobiales	Rubritaleaceae	Luteolibacter	0	9.08595e-05	0	0
547	SV578	Bacteria	Bacteroidota	Bacteroidia	Bacteroidales	Bacteroidaceae	Bacteroides	0	3.02865e-05	0	0
548	SV579	Bacteria	Bacteroidota	Bacteroidia	Bacteroidales	Bacteroidaceae	Bacteroides	0	3.02865e-05	0	0
549	SV580	Bacteria	Proteobacteria	Gammaproteobacteria	Burkholderiales	Comamonadaceae	Ramlibacter	0	6.0573e-05	0	0
550	SV581	Bacteria	Proteobacteria	Alphaproteobacteria	Sphingomonadales	Sphingomonadaceae	Sphingobium	0	9.08595e-05	0	0
551	SV582	Bacteria	Firmicutes	Bacilli	Lactobacillales	Lactobacillaceae	Lactobacillus	0	9.08595e-05	0	0
552	SV583	Bacteria	Proteobacteria	Gammaproteobacteria	Pseudomonadales	Moraxellaceae	Psychrobacter	0	0	9.08595e-05	0
553	SV584	Bacteria	Bacteroidota	Bacteroidia	Flavobacteriales	Weeksellaceae	Chryseobacterium	0	0	0.000272579	0
554	SV585	Bacteria	Bacteroidota	Bacteroidia	Bacteroidales	Paludibacteraceae	NA	0	0	0.000151433	0
555	SV586	Bacteria	Firmicutes	Clostridia	Lachnospirales	Lachnospiraceae	Epulopiscium	0	0	0.000333152	0
556	SV587	Bacteria	Bacteroidota	Bacteroidia	Flavobacteriales	Flavobacteriaceae	Flavobacterium	0	0	0.000121146	0
557	SV588	Bacteria	Bacteroidota	Bacteroidia	Flavobacteriales	Flavobacteriaceae	Flavobacterium	0	0	0	0.000121146
558	SV591	Bacteria	Firmicutes	Clostridia	Clostridiales	Clostridiaceae	Clostridium sensu stricto 1	0	9.08595e-05	0	0
559	SV592	Bacteria	Proteobacteria	Gammaproteobacteria	Pseudomonadales	Moraxellaceae	Acinetobacter	0	3.02865e-05	0	0
560	SV593	Bacteria	Firmicutes	Clostridia	Clostridiales	Clostridiaceae	Proteiniclasticum	0	3.02865e-05	0	0
561	SV596	Bacteria	Bacteroidota	Bacteroidia	Chitinophagales	Chitinophagaceae	Flavihumibacter	0	0.000121146	0	0
562	SV598	Bacteria	Proteobacteria	Gammaproteobacteria	Pseudomonadales	Moraxellaceae	Enhydrobacter	0	0	0.000121146	0
563	SV599	Bacteria	Proteobacteria	Alphaproteobacteria	Sphingomonadales	Sphingomonadaceae	Sphingomonas	0	0	0	6.0573e-05
564	SV600	Bacteria	Proteobacteria	Alphaproteobacteria	Rhodobacterales	Rhodobacteraceae	Paracoccus	0	0	0	0.000121146
565	SV601	Bacteria	Bacteroidota	Bacteroidia	Flavobacteriales	Flavobacteriaceae	Flavobacterium	0	0	0	9.08595e-05
566	SV603	Bacteria	Firmicutes	Clostridia	Peptostreptococcales-Tissierellales	W5053	NA	0	3.02865e-05	0	0
567	SV604	Bacteria	Actinobacteriota	Actinobacteria	Frankiales	Geodermatophilaceae	Antricoccus	0	6.0573e-05	0	0
568	SV605	Bacteria	Myxococcota	Polyangia	Polyangiales	Sandaracinaceae	Sandaracinus	0	9.08595e-05	0	0
569	SV606	Bacteria	Proteobacteria	Gammaproteobacteria	Enterobacterales	Enterobacteriaceae	NA	0	6.0573e-05	0	0
570	SV607	Bacteria	Proteobacteria	Gammaproteobacteria	Alteromonadales	Alteromonadaceae	Rheinheimera	0	3.02865e-05	0	0
571	SV608	Bacteria	Actinobacteriota	Actinobacteria	Micrococcales	Brevibacteriaceae	Brevibacterium	0	0.000151433	0	0
572	SV609	Bacteria	Firmicutes	Clostridia	Oscillospirales	Oscillospiraceae	UCG-002	0	0	0.000302865	0
573	SV610	Bacteria	Proteobacteria	Gammaproteobacteria	Pseudomonadales	Moraxellaceae	Acinetobacter	0	0	0.000151433	0
574	SV612	Bacteria	Proteobacteria	Gammaproteobacteria	Burkholderiales	Neisseriaceae	Vitreoscilla	0	0	0	6.0573e-05
575	SV613	Bacteria	Firmicutes	Clostridia	Peptostreptococcales-Tissierellales	Peptostreptococcaceae	Acetoanaerobium	0	0	0	6.0573e-05
576	SV617	Bacteria	Bacteroidota	Bacteroidia	Bacteroidales	Rikenellaceae	NA	0	3.02865e-05	0	0
577	SV618	Bacteria	Bacteroidota	Bacteroidia	Chitinophagales	Saprospiraceae	NA	0	3.02865e-05	0	0
578	SV619	Bacteria	Chloroflexi	Anaerolineae	SBR1031	A4b	NA	0	6.0573e-05	0	0
579	SV620	Bacteria	Bacteroidota	Bacteroidia	Bacteroidales	Dysgonomonadaceae	Proteiniphilum	0	6.0573e-05	0	0
580	SV621	Bacteria	Bacteroidota	Bacteroidia	Chitinophagales	Chitinophagaceae	Chitinophaga	0	6.0573e-05	0	0
581	SV622	Bacteria	Proteobacteria	Gammaproteobacteria	Aeromonadales	Succinivibrionaceae	NA	0	0	0.000151433	0
582	SV623	Bacteria	Firmicutes	Clostridia	Oscillospirales	Ruminococcaceae	UBA1819	0	0	0.000151433	0
583	SV625	Bacteria	Proteobacteria	Alphaproteobacteria	Acetobacterales	Acetobacteraceae	Gluconobacter	0	0	0.000212006	0
584	SV626	Bacteria	Proteobacteria	Gammaproteobacteria	Pseudomonadales	Pseudomonadaceae	Pseudomonas	0	0	0	9.08595e-05
585	SV629	Bacteria	Bacteroidota	Bacteroidia	Flavobacteriales	Crocinitomicaceae	Fluviicola	0	3.02865e-05	0	0
586	SV631	Bacteria	Firmicutes	Clostridia	Oscillospirales	Ruminococcaceae	NA	0	0	0.000121146	0
587	SV632	Bacteria	Proteobacteria	Gammaproteobacteria	Burkholderiales	Comamonadaceae	Ottowia	0	0	0.000121146	0
588	SV633	Bacteria	Proteobacteria	Gammaproteobacteria	Oceanospirillales	Hahellaceae	Hahella	0	0	0	3.02865e-05
589	SV639	Bacteria	Proteobacteria	Gammaproteobacteria	Xanthomonadales	Xanthomonadaceae	NA	0	3.02865e-05	0	0
590	SV649	Bacteria	Desulfobacterota	Desulfovibrionia	Desulfovibrionales	Desulfovibrionaceae	Desulfovibrio	0	0	3.02865e-05	0

## Sheet: abundance phylum
Phylum	CT0	CT28	TM0	TM28		CT0	CT28	TM0	TM28
Actinobacteriota	0.0271064	0.000787449	0.0106003	3.02865e-05		2.71064	0.0787449	1.06003	0.00302865
Bacteroidota	0.244897	0.00366467	0.196529	0.00284693		24.4897	0.366467	19.6529	0.284693
Campilobacterota	0.00602702	0	0.00629959	9.08595e-05		0.602702	0	0.629959	0.00908595
Chloroflexi	0	6.0573e-05	0	0		0	0.0060573	0	0
Deinococcota	0	6.0573e-05	0.000726876	0		0	0.0060573	0.0726876	0
Desulfobacterota	0.00766249	0	0.0123569	0		0.766249	0	1.23569	0
Firmicutes	0.0520322	0.221606	0.0950088	0.208068		5.20322	22.1606	9.50088	20.8068
Fusobacteriota	0.0159307	0.000333152	0.0567872	0.000272579		1.59307	0.0333152	5.67872	0.0272579
Myxococcota	0	9.08595e-05	0	0		0	0.00908595	0	0
Proteobacteria	0.645466	0.773305	0.602611	0.788691		64.5466	77.3305	60.2611	78.8691
Spirochaetota	0	0	0.000393725	0		0	0	0.0393725	0
Synergistota	0	0	0.00187776	0		0	0	0.187776	0
Verrucomicrobiota	0.000878309	9.08595e-05	0.016809	0		0.0878309	0.00908595	1.6809	0

## Sheet: abundance class
Class	CT0	CT28	TM0	TM28
Actinobacteria	0.0258647	0.000787449	0.0106003	3.02865e-05
Alphaproteobacteria	0.0350112	0.000363438	0.00629959	0.0011206
Anaerolineae	0	6.0573e-05	0	0
Bacilli	0.0136592	0.22097	0.0764432	0.207129
Bacteroidia	0.244897	0.00366467	0.196529	0.00284693
Campylobacteria	0.00602702	0	0.00629959	9.08595e-05
Clostridia	0.0331032	0.000636017	0.0117209	0.000938882
Coriobacteriia	0.00124175	0	0	0
Deinococci	0	6.0573e-05	0.000726876	0
Desulfovibrionia	0.00766249	0	0.0123569	0
Fusobacteriia	0.0159307	0.000333152	0.0567872	0.000272579
Gammaproteobacteria	0.610455	0.772942	0.596311	0.78757
Negativicutes	0.00526985	0	0.00684475	0
Polyangia	0	9.08595e-05	0	0
Spirochaetia	0	0	0.000393725	0
Synergistia	0	0	0.00187776	0
Verrucomicrobiae	0.000878309	9.08595e-05	0.016809	0

## Sheet: abundance order
Order	CT0	CT28	TM0	TM28
Acetobacterales	6.0573e-05	0	0.000212006	0.000302865
Acholeplasmatales	0	0	0.000242292	0
Acidaminococcales	0	0	0.00184748	0
Actinomycetales	0	0	0.000969168	0
Aeromonadales	0.0394028	0.257011	0.117603	0.32985
Alteromonadales	0.00678418	0.0636925	0.00505785	0.0854382
Bacillales	0.00396753	0.000273	0.00109031	0.000938882
Bacteroidales	0.0372524	0.000242292	0.0283482	9.08595e-05
Bifidobacteriales	0.00384639	0	0	0
Burkholderiales	0.06448	0.00430068	0.1279	0.00811678
Campylobacterales	0.00602702	0	0.00629959	9.09e-05
Cardiobacteriales	0	0	0	6.06e-05
Caulobacterales	0.00245321	0	0	0
Chitinophagales	0.00526985	0.000212006	0.0011206	0
Christensenellales	0	0	0.000212006	0
Clostridiales	0.00257435	0.000121146	0.00542128	0.000272579
Coriobacteriales	0.00124175	0	0	0
Corynebacteriales	0.00947968	0.000363438	0	0
Cytophagales	0	0	0.0015749	0
Deinococcales	0	6.0573e-05	0.000726876	0
Desulfovibrionales	0.00766249	0	0.0123569	0
Enterobacterales	0.0159004	0.00196862	0.0187171	0.00466412
Erysipelotrichales	0.0047247	0	0.00545157	0
Eubacteriales	0	0	0.000514871	0
Exiguobacterales	0	0.000121146	0	0.000333152
Flavobacteriales	0.196317	0.00299836	0.163941	0.00266521
Frankiales	0.00281664	6.0573e-05	0	0
Fusobacteriales	0.0159307	0.000333152	0.0567872	0.000272579
Lachnospirales	0.0178388	0.000272579	0.00251378	0.000272579
Lactobacillales	0.00496699	0.123206	0.0676601	0.0648131
Methylococcales	0	0	0.0020292	0
Micrococcales	0.00950996	0.000363438	0.00905567	3.02865e-05
Oceanospirillales	0	0	0	3.03e-05
Oscillospirales	0.0098734	0.000182	0.000575444	0
Pasteurellales	0	0	0.00069659	0
Peptostreptococcales-Tissierellales	0.00281664	6.0573e-05	0.00248349	0.000393725
Polyangiales	0	9.09e-05	0	0
Propionibacteriales	0.000212006	0	0.000575444	0
Pseudomonadales	0.480738	0.444606	0.319462	0.358653
Rhizobiales	0.0299534	0.000121146	0.000757163	0.000121
Rhodobacterales	0.00254407	6.0573e-05	0.00212006	0.000636017
SBR1031	0	6.06e-05	0	0
Sphingobacteriales	0.0060573	0.000212006	0.00154461	9.09e-05
Sphingomonadales	0	0.000181719	0.00321037	6.0573e-05
Spirochaetales	0	0	0.000393725	0
Staphylococcales	0	0.0973711	0.00199891	0.141044
Synergistales	0	0	0.00187776	0
Veillonellales-Selenomonadales	0.00526985	0	0.00499727	0
Verrucomicrobiales	0.000878309	9.08595e-05	0.016809	0
Xanthomonadales	0.0031498	0.00136289	0.00484584	0.000757163

## Sheet: abundance family
Family	CT0	CT28	TM0	TM28
A4b	0	6.0573e-05	0	0
Acetobacteraceae	6.0573e-05	0	0.000212006	0.000302865
Acholeplasmataceae	0	0	0.000242292	0
Acidaminococcaceae	0	0	0.00184748	0
Actinomycetaceae	0	0	0.000969168	0
Aeromonadaceae	0.0394028	0.257011	0.117451	0.329638
Akkermansiaceae	0.000878309	0	0.016173	0
Alcaligenaceae	0	0	0.00230177	0
Alteromonadaceae	0	3.02865e-05	0	6.0573e-05
Aquaspirillaceae	0	0	0.00148404	0
Arcobacteraceae	0.00602702	0	0.00629959	9.08595e-05
Bacteroidaceae	0.0103883	6.0573e-05	0.00766249	0
Barnesiellaceae	0	0	0.00193834	0
Beijerinckiaceae	0.0299534	0	0	6.0573e-05
Bifidobacteriaceae	0.00384639	0	0	0
Brevibacteriaceae	0	0.000151433	0	0
Burkholderiaceae	0	0	0.000393725	0
Burkholderiales Incertae Sedis	0	0	0.000363438	0
Carnobacteriaceae	0	0.0222303	0.00166576	0.00723848
Caulobacteraceae	0.00245321	0	0	0
Chitinibacteraceae	0	0.00142347	0.00293779	0.00511842
Chitinophagaceae	0.00526985	0.000181719	0.0011206	0
Christensenellaceae	0	0	0.000212006	0
Chromobacteriaceae	0	0	0.00396753	0.000181719
Clostridiaceae	0.00257435	0.000121146	0.00542129	0.000272579
Comamonadaceae	0.0567569	0.000666303	0.0988249	0.00142347
Coriobacteriaceae	0.00124175	0	0	0
Corynebacteriaceae	0.00548186	0.000242292	0	0
Crocinitomicaceae	0.00260464	3.02865e-05	0.00345266	0
Deinococcaceae	0	6.0573e-05	0.000726876	0
Dermabacteraceae	0	0	0.000454298	0
Dermatophilaceae	0	0	0.00060573	0
Desulfovibrionaceae	0.00766249	0	0.0123569	0
DEV007	0	0	0.000636017	0
Devosiaceae	0	6.0573e-05	0.000757163	0
Dietziaceae	0	0.000121146	0	0
Dysgonomonadaceae	0.00590587	0.000151433	0.0071779	9.08595e-05
Enterobacteriaceae	0.0106306	0.00154461	0.00957054	0.0033618
Enterococcaceae	0	0.000242292	0.000393725	0.000514871
Erwiniaceae	0	0	0	0.000817736
Erysipelatoclostridiaceae	0	0	0.00060573	0
Erysipelotrichaceae	0.0047247	0	0.00484584	0
Eubacteriaceae	0	0	0.000514871	0
Exiguobacteraceae	0	0.000121146	0	0.000333152
Finegoldia	0	0	0.000333152	0
Flavobacteriaceae	0.0380701	0.000726876	0.044824	0.00109031
Fusobacteriaceae	0.0159307	0.000333152	0.0567872	0.000272579
Geodermatophilaceae	0	6.0573e-05	0	0
Hafniaceae	0	0.000151433	0.0015749	0
Hahellaceae	0	0	0	3.02865e-05
JI49D030	0	0	0	0.000212006
Lachnospiraceae	0.0178388	0.000272579	0.00251378	0.000272579
Lactobacillaceae	0	9.08595e-05	0	0
Leuconostocaceae	0	0.000999455	0.0038161	0.00436126
Listeriaceae	0.00272579	0.0505785	0.0193228	0.0197165
Marinifilaceae	0	0	0.000272579	0
Methylococcaceae	0	0	0.0020292	0
Microbacteriaceae	0.00184748	0	0.000454298	0
Micrococcaceae	0.00766249	0.000212006	0.00754134	3.02865e-05
Moraxellaceae	0.448816	0.325429	0.303047	0.2611
Morganellaceae	0.00526985	0	0.00757163	0
Neisseriaceae	0.00629959	0.000121146	0.0130838	0.000333152
Nocardiaceae	0.00399782	0	0	0
Nocardioidaceae	0	0	0.000575444	0
Oscillospiraceae	0	0	0.000302865	0
Oxalobacteraceae	0	0.0020292	0.00342238	0.00106003
Paludibacteraceae	0	0	0.00221092	0
Pasteurellaceae	0	0	0.00069659	0
Peptostreptococcaceae	0.00281665	3.02865e-05	0.00215034	0.000393725
Planococcaceae	0.00396753	0.000272579	0.00109031	0.000938882
Prevotellaceae	0.00781392	0	0	0
Propionibacteriaceae	0.000212006	0	0	0
Pseudomonadaceae	0.031922	0.119177	0.0164153	0.0975528
Rhizobiaceae	0	6.0573e-05	0	6.0573e-05
Rhodanobacteraceae	0	0.000363438	0	0
Rhodobacteraceae	0.00254407	6.0573e-05	0.00212006	0.000636017
Rhodocyclaceae	0.00142347	6.0573e-05	0.0011206	0
Rikenellaceae	0.0131443	3.02865e-05	0.00751105	0
Rubritaleaceae	0	9.08595e-05	0	0
Ruminococcaceae	0.0098734	0.000181719	0.000272579	0
Sandaracinaceae	0	9.08595e-05	0	0
Saprospiraceae	0	3.02865e-05	0	0
Selenomonadaceae	0.000302865	0	0.000514871	0
Shewanellaceae	0.00678418	0.0636622	0.00505785	0.0853777
Sphingobacteriaceae	0.0060573	0.000212006	0.00154461	9.08595e-05
Sphingomonadaceae	0	0.000181719	0.00321037	6.0573e-05
Spirochaetaceae	0	0	0.000393725	0
Spirosomaceae	0	0	0.0015749	0
Sporichthyaceae	0.00281665	0	0	0
Sporomusaceae	0	0	0.000757163	0
Staphylococcaceae	0	0.0973711	0.00199891	0.141044
Streptococcaceae	0.0022412	0.0398268	0.0354352	0.0268036
Succinivibrionaceae	0	0	0.000151433	0
Synergistaceae	0	0	0.00187776	0
Tannerellaceae	0	0	0.000969168	0
Vagococcaceae	0	0.00923739	0.00702647	0.00617845
Veillonellaceae	0.00496699	0	0.00372524	0
W5053	0	3.02865e-05	0	0
Weeksellaceae	0.155642	0.0022412	0.115664	0.0015749
Williamwhitmaniaceae	0	0	0.00060573	0
Wohlfahrtiimonadaceae	0	0	0	6.0573e-05
Xanthomonadaceae	0.0031498	0.000999455	0.00484584	0.000757163
Yersiniaceae	0	0.000272579	0	0.000484584

## Sheet: abundance genus
Genus	CT0	CT28	TM0	TM28		CT0	CT28	TM0	TM28
Acinetobacter	0.396336	0.30943	0.262706	0.254753		39.6336	30.943	26.2706	25.4753
Aeromonas	0.0414529	0.257307	0.122803	0.330519		4.14529	25.7307	12.2803	33.0519
Pseudomonas	0.0335829	0.119315	0.0171633	0.0978135		3.35829	11.9315	1.71633	9.78135
Macrococcus	0	0.0974833	0.00209	0.141421		0	9.74833	0.209	14.1421
Shewanella	0.00713717	0.0637356	0.00528832	0.0856058		0.713717	6.37356	0.528832	8.56058
Brochothrix	0.00286761	0.0506367	0.0202033	0.0197692		0.286761	5.06367	2.02033	1.97692
Lactococcus	0.000477935	0.0384475	0.017575	0.0254783		0.0477935	3.84475	1.7575	2.54783
Carnobacterium	0	0.0222559	0.00174166	0.00725782		0	2.22559	0.174166	0.725782
Psychrobacter	0.032404	0.0156458	0.00845499	0.00646827		3.2404	1.56458	0.845499	0.646827
Vagococcus	0	0.00924803	0.00734665	0.00619496		0	0.924803	0.734665	0.619496
Janthinobacterium	0	0.00203153	0.00285	0.00106286		0	0.203153	0.285	0.106286
Iodobacter	0	0.00142511	0.00307166	0.0051321		0	0.142511	0.307166	0.51321
Streptococcus	0.00187988	0.00142511	0.0192216	0.0013969		0.187988	0.142511	1.92216	0.13969
Chryseobacterium	0.0662418	0.00121286	0.0365749	0.000637716		6.62418	0.121286	3.65749	0.0637716
Soonwooa	0.084722	0.000970285	0.0608316	0.000759186		8.4722	0.0970285	6.08316	0.0759186
Leuconostoc	0	0.000545785	0	0.000637716		0	0.0545785	0	0.0637716
Enhydrobacter	0.0416441	0.000545785	0.0456949	0.000455512		4.16441	0.0545785	4.56949	0.0455512
Weissella	0	0.000454821	0.00398999	0.0037352		0	0.0454821	0.398999	0.37352
Comamonas	0.0342839	0.000454821	0.0655816	0.0013058		3.42839	0.0454821	6.55816	0.13058
Flavobacterium	0.040051	0.0004245	0.0465499	0.000698451		4.0051	0.04245	4.65499	0.0698451
Arenimonas	0	0.000394178	0	0.000151837		0	0.0394178	0	0.0151837
Cetobacterium	0.00630875	0.000333535	0.0446183	0.000273307		0.630875	0.0333535	4.46183	0.0273307
Plesiomonas	0	0.000303214	0.00503499	0.000911023		0	0.0303214	0.503499	0.0911023
Myroides	0	0.000303214	0.000316666	0.000394777		0	0.0303214	0.0316666	0.0394777
Citrobacter	0.00458818	0.000303214	0.002755	0.00024294		0.458818	0.0303214	0.2755	0.024294
Kurthia	0.00417397	0.000272893	0.00114	0.000668084		0.417397	0.0272893	0.114	0.0668084
Stenotrophomonas	0.00197547	0.000272893	0.00506666	0.000485879		0.197547	0.0272893	0.506666	0.0485879
Enterococcus	0	0.000242571	0.000411666	0.000516247		0	0.0242571	0.0411666	0.0516247
Thermomonas	0	0.000242571	0	0.00012147		0	0.0242571	0	0.012147
Corynebacterium	0.000223036	0.000242571	0	0		0.0223036	0.0242571	0	0
Yersinia	0	0.00021225	0	0.000485879		0	0.021225	0	0.0485879
Lelliottia	0	0.00021225	0	0.000212572		0	0.021225	0	0.0212572
Sphingobacterium	0.00497053	0.00021225	0.000506666	9.11023e-05		0.497053	0.021225	0.0506666	0.00911023
Dokdonella	0	0.000181928	0	0		0	0.0181928	0	0
Pseudofulvimonas	0	0.000181928	0	0		0	0.0181928	0	0
Sphingobium	0	0.000181928	0	0		0	0.0181928	0	0
XBB1006	0	0.000181928	0	0		0	0.0181928	0	0
Arthrobacter	0.00806118	0.000151607	0.00541499	3.03674e-05		0.806118	0.0151607	0.541499	0.00303674
Brevibacterium	0	0.000151607	0	0		0	0.0151607	0	0
Hafnia-Obesumbacterium	0	0.000151607	0	0		0	0.0151607	0	0
Exiguobacterium	0	0.000121286	0	0.000334042		0	0.0121286	0	0.0334042
Uruburuella	0	0.000121286	0.00645999	6.07349e-05		0	0.0121286	0.645999	0.00607349
Acidovorax	0	0.000121286	0.00455999	0		0	0.0121286	0.455999	0
Faecalibacterium	0.00602199	0.000121286	0	0		0.602199	0.0121286	0	0
Dietzia	0	0.000121286	0	0		0	0.0121286	0	0
Flavihumibacter	0	0.000121286	0	0		0	0.0121286	0	0
Blautia	0.00876215	9.09642e-05	0.000918332	0.000212572		0.876215	0.00909642	0.0918332	0.0212572
Raoultella	0	9.09642e-05	0	3.03674e-05		0	0.00909642	0	0.00303674
Clostridium sensu stricto 1	0.0027083	9.09642e-05	0.00389499	0		0.27083	0.00909642	0.389499	0
Lactobacillus	0	9.09642e-05	0	0		0	0.00909642	0	0
Luteolibacter	0	9.09642e-05	0	0		0	0.00909642	0	0
Sandaracinus	0	9.09642e-05	0	0		0	0.00909642	0	0
Rhodobacter	0	6.06428e-05	0	0.00024294		0	0.00606428	0	0.024294
Brucella	0	6.06428e-05	0	6.07349e-05		0	0.00606428	0	0.00607349
Bacteroides	0.0109288	6.06428e-05	0.00801165	0		1.09288	0.00606428	0.801165	0
Deinococcus	0	6.06428e-05	0.000759999	0		0	0.00606428	0.0759999	0
Subdoligranulum	0.00436514	6.06428e-05	0	0		0.436514	0.00606428	0	0
Luteimonas	0.00133822	6.06428e-05	0	0		0.133822	0.00606428	0	0
Antricoccus	0	6.06428e-05	0	0		0	0.00606428	0	0
Azoarcus	0	6.06428e-05	0	0		0	0.00606428	0	0
Chitinophaga	0	6.06428e-05	0	0		0	0.00606428	0	0
Glutamicibacter	0	6.06428e-05	0	0		0	0.00606428	0	0
Klebsiella	0	6.06428e-05	0	0		0	0.00606428	0	0
Pelagibacterium	0	6.06428e-05	0	0		0	0.00606428	0	0
Proteiniphilum	0	6.06428e-05	0	0		0	0.00606428	0	0
Ramlibacter	0	6.06428e-05	0	0		0	0.00606428	0	0
Peptostreptococcus	0	3.03214e-05	0.000443333	0.000303674		0	0.00303214	0.0443333	0.0303674
Rheinheimera	0	3.03214e-05	0	6.07349e-05		0	0.00303214	0	0.00607349
Fluviicola	0.00274016	3.03214e-05	0.00360999	0		0.274016	0.00303214	0.360999	0
Escherichia-Shigella	0	3.03214e-05	0	0		0	0.00303214	0	0
Proteiniclasticum	0	3.03214e-05	0	0		0	0.00303214	0	0
Tatumella	0	0	0	0.000819921		0	0	0	0.0819921
Paracoccus	0.00267644	0	0.000253333	0.000394777		0.267644	0	0.0253333	0.0394777
Enterobacter	0	0	0	0.000394777		0	0	0	0.0394777
Gluconobacter	0	0	0.000221666	0.000303674		0	0	0.0221666	0.0303674
Lysinibacillus	0	0	0	0.000273307		0	0	0	0.0273307
Crenobacter	0	0	0	0.000182205		0	0	0	0.0182205
Alicycliphilus	0	0	0	0.00012147		0	0	0	0.012147
Arcobacter	0.00634061	0	0.00658666	9.11023e-05		0.634061	0	0.658666	0.00911023
Empedobacter	0.00385534	0	0.0161183	6.07349e-05		0.385534	0	1.61183	0.00607349
Vitreoscilla	0.00299506	0	0.00433833	6.07349e-05		0.299506	0	0.433833	0.00607349
Sphingomonas	0	0	0.00253333	6.07349e-05		0	0	0.253333	0.00607349
Methylobacterium-Methylorubrum	0.0315119	0	0	6.07349e-05		3.15119	0	0	0.00607349
Acetoanaerobium	0	0	0	6.07349e-05		0	0	0	0.00607349
Agathobacter	0	0	0	6.07349e-05		0	0	0	0.00607349
Proteocatella	0	0	0.001805	3.03674e-05		0	0	0.1805	0.00303674
Hahella	0	0	0	3.03674e-05		0	0	0	0.00303674
Akkermansia	0.000924008	0	0.01691	0		0.0924008	0	1.691	0
Fusobacterium	0.0104509	0	0.0147566	0		1.04509	0	1.47566	0
Desulfovibrio	0.00388721	0	0.0101333	0		0.388721	0	1.01333	0
Dysgonomonas	0.00621316	0	0.00699832	0		0.621316	0	0.699832	0
Morganella	0.0029632	0	0.00522499	0		0.29632	0	0.522499	0
Brachymonas	0	0	0.00519332	0		0	0	0.519332	0
dgA-11 gut group	0.00974988	0	0.00471833	0		0.974988	0	0.471833	0
Rhodoferax	0	0	0.00465499	0		0	0	0.465499	0
Vogesella	0	0	0.00414833	0		0	0	0.414833	0
Veillonella	0.00417397	0	0.00389499	0		0.417397	0	0.389499	0
Hydrogenophaga	0	0	0.00322999	0		0	0	0.322999	0
Alistipes	0.00407838	0	0.00285	0		0.407838	0	0.285	0
Solobacterium	0	0	0.00285	0		0	0	0.285	0
Providencia	0.00258085	0	0.00269166	0		0.258085	0	0.269166	0
Pelomonas	0	0	0.00253333	0		0	0	0.253333	0
Bilophila	0.00417397	0	0.00212166	0		0.417397	0	0.212166	0
Methyloparacoccus	0	0	0.00212166	0		0	0	0.212166	0
Gemmobacter	0	0	0.00196333	0		0	0	0.196333	0
Phascolarctobacterium	0	0	0.00193166	0		0	0	0.193166	0
Rothia	0	0	0.0019	0		0	0	0.19	0
Edwardsiella	0	0	0.00164666	0		0	0	0.164666	0
Microvirgula	0	0	0.00155166	0		0	0	0.155166	0
Polaromonas	0	0	0.00129833	0		0	0	0.129833	0
Niabella	0.00554405	0	0.00117166	0		0.554405	0	0.117166	0
Dechloromonas	0	0	0.00117166	0		0	0	0.117166	0
Nubsella	0	0	0.00110833	0		0	0	0.110833	0
Arcicella	0	0	0.00107666	0		0	0	0.107666	0
Cloacibacillus	0	0	0.00107666	0		0	0	0.107666	0
Parabacteroides	0	0	0.00101333	0		0	0	0.101333	0
Bergeyella	0	0	0.000981665	0		0	0	0.0981665	0
Epulopiscium	0	0	0.000886665	0		0	0	0.0886665	0
[Anaerorhabdus] furcosa group	0.00143381	0	0.000854999	0		0.143381	0	0.0854999	0
Cloacibacterium	0	0	0.000823332	0		0	0	0.0823332	0
Pelosinus	0	0	0.000791665	0		0	0	0.0791665	0
Turicibacter	0	0	0.000728332	0		0	0	0.0728332	0
Undibacterium	0	0	0.000728332	0		0	0	0.0728332	0
Acetobacteroides	0	0	0.000633332	0		0	0	0.0633332	0
Erysipelotrichaceae UCG-006	0	0	0.000633332	0		0	0	0.0633332	0
Nocardioides	0	0	0.000601666	0		0	0	0.0601666	0
Flectobacillus	0	0	0.000569999	0		0	0	0.0569999	0
Petrimonas	0	0	0.000506666	0		0	0	0.0506666	0
Leucobacter	0.00149753	0	0.000474999	0		0.149753	0	0.0474999	0
Brachybacterium	0	0	0.000474999	0		0	0	0.0474999	0
Limnobacter	0	0	0.000411666	0		0	0	0.0411666	0
Treponema	0	0	0.000411666	0		0	0	0.0411666	0
2013Ark19i	0	0	0.000379999	0		0	0	0.0379999	0
UCG-002	0	0	0.000316666	0		0	0	0.0316666	0
Butyricimonas	0	0	0.000285	0		0	0	0.0285	0
Rikenella	0	0	0.000285	0		0	0	0.0285	0
Floricoccus	0	0	0.000253333	0		0	0	0.0253333	0
SD04E11	0	0	0.000221666	0		0	0	0.0221666	0
UBA1819	0	0	0.000158333	0		0	0	0.0158333	0
Ottowia	0	0	0.000126666	0		0	0	0.0126666	0
Prevotella	0.00822049	0	0	0		0.822049	0	0	0
Lawsonella	0.00554405	0	0	0		0.554405	0	0	0
Bifidobacterium	0.00404652	0	0	0		0.404652	0	0	0
Stenoxybacter	0.00363231	0	0	0		0.363231	0	0	0
Holdemanella	0.00353672	0	0	0		0.353672	0	0	0
Rhodococcus	0.00324996	0	0	0		0.324996	0	0	0
Dorea	0.00299506	0	0	0		0.299506	0	0	0
Peptoclostridium	0.0029632	0	0	0		0.29632	0	0	0
Brevundimonas	0.00258085	0	0	0		0.258085	0	0	0
Cronobacter	0.00162498	0	0	0		0.162498	0	0	0
Dechlorobacter	0.00149753	0	0	0		0.149753	0	0	0
Pedobacter	0.00140194	0	0	0		0.140194	0	0	0
Collinsella	0.00130636	0	0	0		0.130636	0	0	0
Megasphaera	0.00105146	0	0	0		0.105146	0	0	0
Microbacterium	0.000446073	0	0	0		0.0446073	0	0	0
Megamonas	0.000318624	0	0	0		0.0318624	0	0	0
Cutibacterium	0.000223036	0	0	0		0.0223036	0	0	0
Asaia	6.37247e-05	0	0	0		0.00637247	0	0	0
